# Supplementary material
Source: PubMed Central journal article supplement (PMC5311416)
Supplement: AEM.02617-16_zam999117692s1.pdf [file AEM.02617-16_zam999117692s1.pdf]

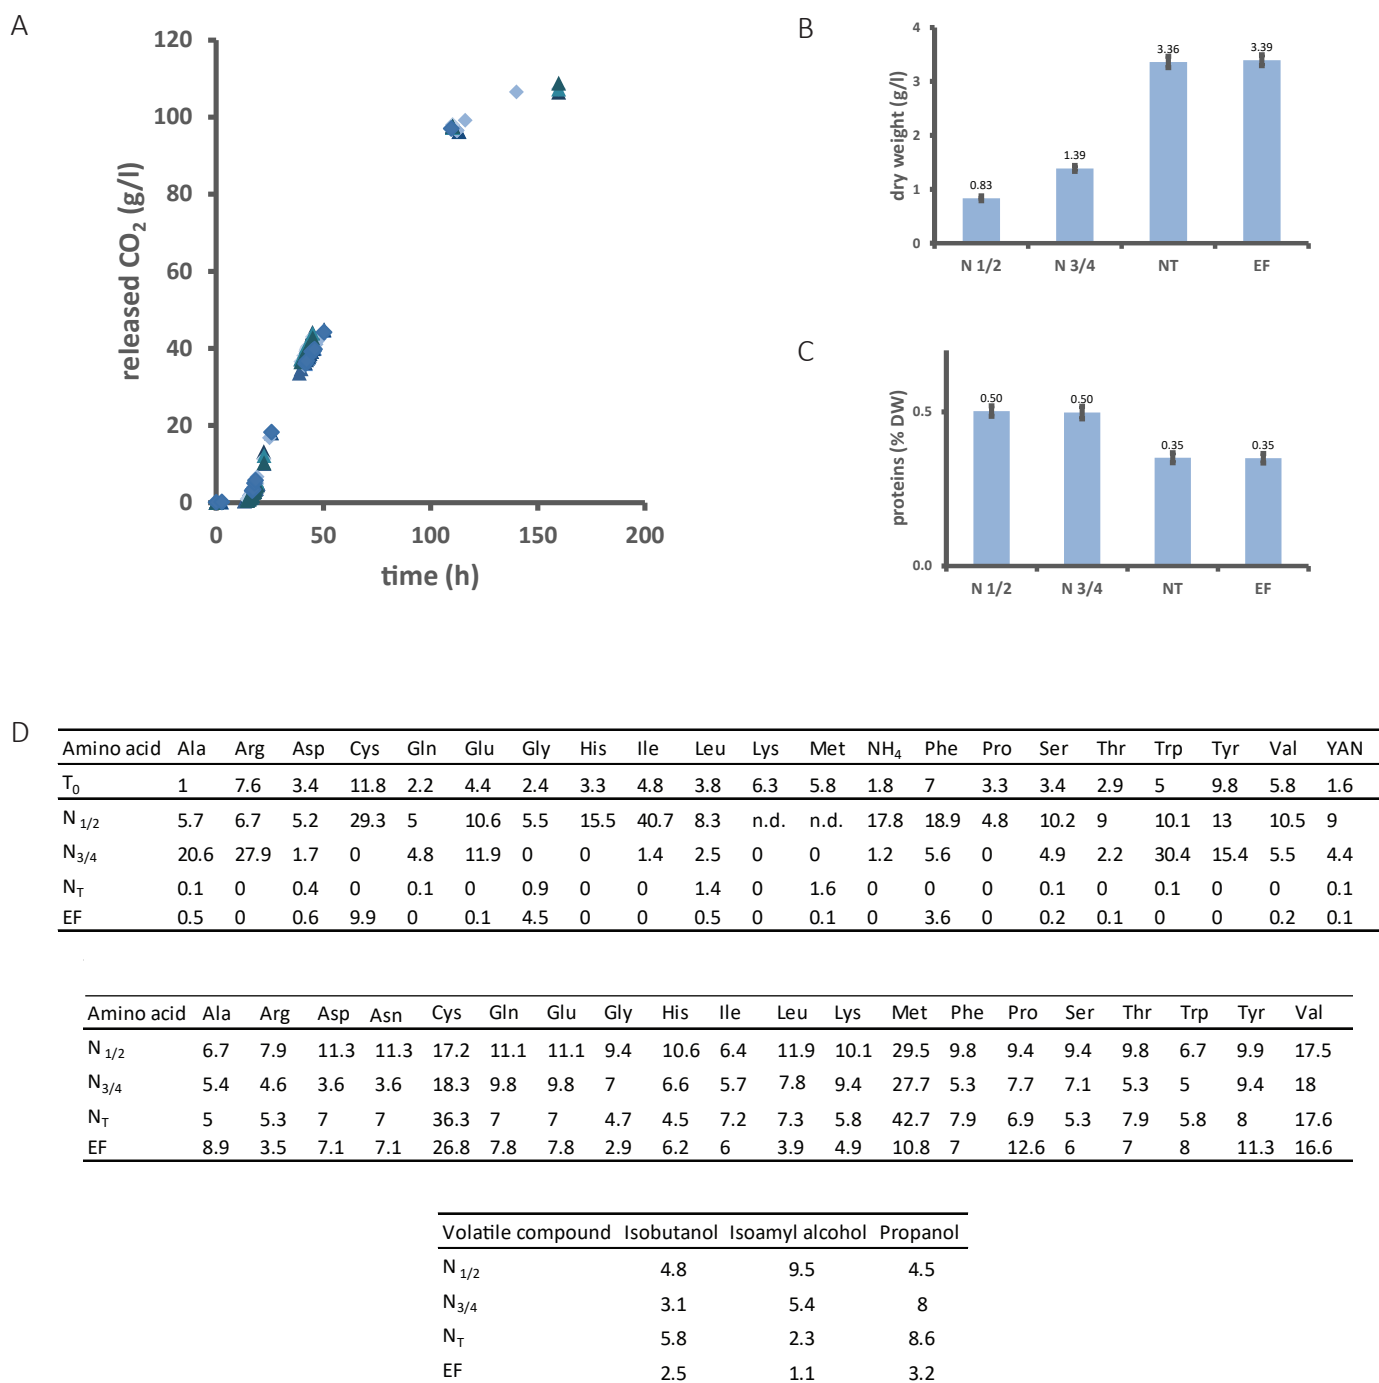

**Figure S1 – Reproducibility of biological parameters from a set of 14 independent fermentations.**

Fermentations were carried out using the same experimental conditions (medium composition, operating conditions, and yeast strain). Only one nitrogen source (Arg, Gln, NH<sub>4</sub>, Val, Leu, Ile, and Thr) was provided in labeled form for each fermentation, and fermentations were performed in duplicate.

- A CO<sub>2</sub> release measured by weight loss throughout the 14 independent fermentations.
- B-C Mean values and standard deviations of dry weight and protein content obtained from the 14 independent fermentations.
- D Within-subject variation coefficients (WSCV) calculated from residual (T<sub>0</sub>, N<sub>1/2</sub>) or consumed (N<sub>1/2</sub>, N<sub>3/4</sub>, EF) amino acid concentrations and volatile compound concentrations measured during the 14 independent fermentations.

T<sub>0</sub>, N<sub>1/2</sub>, N<sub>3/4</sub>, N<sub>T</sub> and EF: initial time, 1/2, 3/4, complete nitrogen consumption and end of fermentation, respectively.

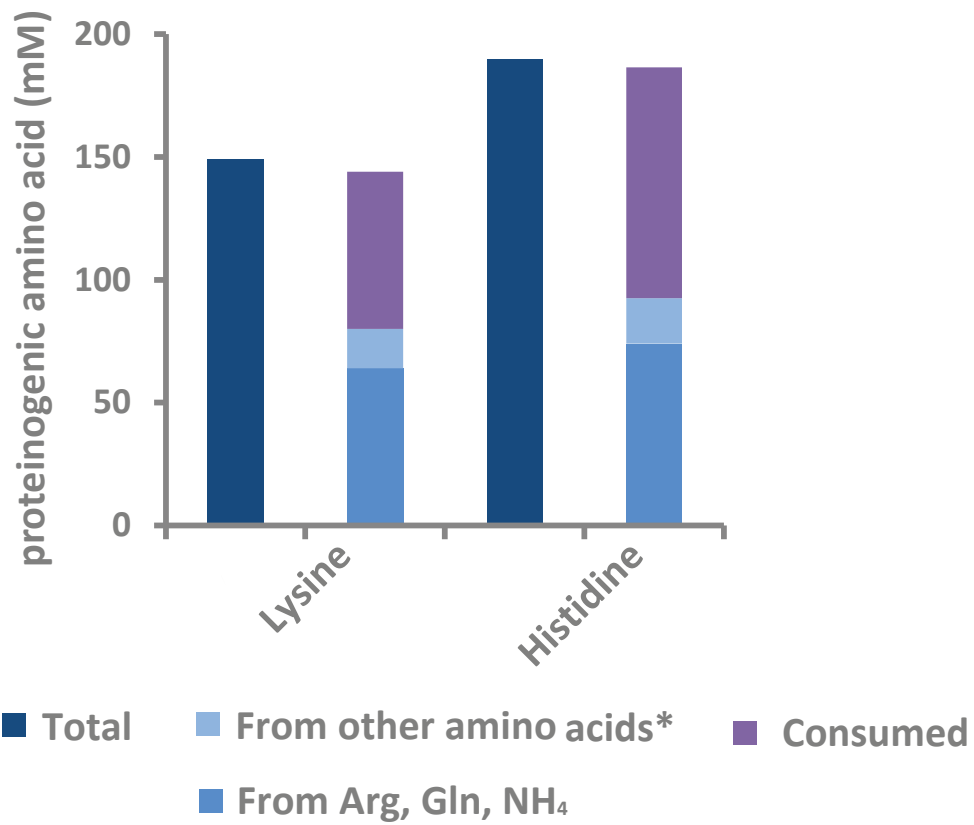

**Figure S2 – Origin of proteinogenic histidine and lysine.**

The proteinogenic amino acids (dark blue) can originate from de novo synthesis using nitrogen provided by arginine, glutamine and ammonium (blue) or by other amino acids (light blue, calculated value considering that only 80 % of the intracellular nitrogen pool is provided by the 3 most abundant amino acids) or from direct incorporation of consumed compound (purple).

**Dataset S1: Raw data: residual amino acids (mM)**

Means, standard deviations and standard errors of the mean were calculated from 14 independent experiments.

|                | Ala    | Arg    | Asp    | Cys    | Gln    | Glu    | Gly    | His    | Ile    | Leu    | Lys    | Met    | NH <sub>4</sub> | Phe    | Pro    | Ser    | Thr    | Trp    | Tyr    | Val    | NaN    |        |  |
|----------------|--------|--------|--------|--------|--------|--------|--------|--------|--------|--------|--------|--------|-----------------|--------|--------|--------|--------|--------|--------|--------|--------|--------|--|
| T <sub>0</sub> | 0.0972 | 0.1747 | 0.1159 | 0.2282 | 1.3793 | 0.5355 | 0.1039 | 0.0969 | 0.1549 | 0.1653 | 0.0499 | 0.0892 | 0.0453          | 0.0799 | 0.2034 | 0.3020 | 0.2671 | 0.2426 | 0.1642 | 0.2642 | 0.5881 |        |  |
|                | 0.0603 | 0.1139 | 0.0119 | 0.0209 | 0.0880 | 0.1811 | 0.0209 | 0.0880 | 0.1132 | 0.0149 | 0.0448 | 0.0209 | 0.0149          | 0.0209 | 0.0209 | 0.0209 | 0.0209 | 0.0209 | 0.0209 | 0.0209 | 0.0209 |        |  |
|                | 0.7732 | 0.9580 | 0.1217 | 0.0219 | 1.3529 | 0.5354 | 0.1147 | 0.0944 | 0.1144 | 0.1680 | 0.0517 | 0.0874 | 0.3151          | 0.1021 | 0.2504 | 0.3425 | 0.3028 | 0.4570 | 0.0474 | 0.1774 | 0.5683 |        |  |
|                | 0.9599 | 0.9665 | 0.1347 | 0.0289 | 1.4526 | 0.4214 | 0.1165 | 0.0907 | 0.1134 | 0.1710 | 0.0509 | 0.0881 | 0.3875          | 0.1144 | 0.2492 | 0.3419 | 0.3064 | 0.4758 | 0.0509 | 0.1895 | 0.8556 |        |  |
|                | 0.7111 | 0.8406 | 0.1270 | 0.0219 | 1.3529 | 0.5354 | 0.1147 | 0.0944 | 0.1144 | 0.1680 | 0.0517 | 0.0874 | 0.3151          | 0.1021 | 0.2504 | 0.3425 | 0.3028 | 0.4570 | 0.0474 | 0.1774 | 0.5683 |        |  |
|                | 0.7233 | 0.8379 | 0.1263 | 0.0210 | 1.3714 | 0.5188 | 0.1080 | 0.0889 | 0.1124 | 0.1645 | 0.0444 | 0.0840 | 0.4548          | 0.1103 | 0.2262 | 0.3218 | 0.2895 | 0.3753 | 0.0537 | 0.1671 | 0.4830 |        |  |
|                | 0.9556 | 1.0393 | 0.1400 | 0.0216 | 1.4602 | 0.3767 | 0.1214 | 0.0980 | 0.1130 | 0.1970 | 0.0546 | 0.0882 | 0.4000          | 0.1144 | 0.2492 | 0.3789 | 0.3332 | 0.5029 | 0.0293 | 0.1317 | 10.019 |        |  |
|                | 0.7781 | 0.9622 | 0.1270 | 0.0219 | 1.3529 | 0.5354 | 0.1147 | 0.0944 | 0.1144 | 0.1680 | 0.0517 | 0.0874 | 0.3151          | 0.1021 | 0.2504 | 0.3425 | 0.3028 | 0.4570 | 0.0474 | 0.1774 | 0.5683 |        |  |
|                | 0.7340 | 0.8450 | 0.1217 | 0.0219 | 1.4266 | 0.3559 | 0.1103 | 0.0900 | 0.1140 | 0.1640 | 0.0441 | 0.0806 | 0.4043          | 0.1109 | 0.2298 | 0.3245 | 0.2921 | 0.4767 | 0.0460 | 0.1556 | 9.4778 |        |  |
|                | 0.7188 | 0.8110 | 0.1288 | 0.0269 | 1.3720 | 0.5622 | 0.1163 | 0.0944 | 0.1163 | 0.1640 | 0.0441 | 0.0806 | 0.4043          | 0.1109 | 0.2298 | 0.3245 | 0.2921 | 0.4767 | 0.0460 | 0.1556 | 9.4778 |        |  |
|                | 0.7633 | 0.9199 | 0.1217 | 0.0219 | 1.4266 | 0.3559 | 0.1103 | 0.0900 | 0.1140 | 0.1640 | 0.0441 | 0.0806 | 0.4043          | 0.1109 | 0.2298 | 0.3245 | 0.2921 | 0.4767 | 0.0460 | 0.1556 | 9.4778 |        |  |
|                | 0.7179 | 0.8250 | 0.1288 | 0.0269 | 1.3720 | 0.5622 | 0.1163 | 0.0944 | 0.1163 | 0.1640 | 0.0441 | 0.0806 | 0.4043          | 0.1109 | 0.2298 | 0.3245 | 0.2921 | 0.4767 | 0.0460 | 0.1556 | 9.4778 |        |  |
|                | 0.6949 | 0.4584 | 0.0203 | 0.0203 | 0.5394 | 0.2227 | 0.0109 | 0.0109 | 0.0109 | 0.0109 | 0.0109 | 0.0109 | 0.0109          | 0.0109 | 0.0109 | 0.0109 | 0.0109 | 0.0109 | 0.0109 | 0.0109 | 0.0109 | 0.0109 |  |
|                | 0.6500 | 0.5716 | 0.0206 | 0.0206 | 0.4031 | 0.0655 | 0.0158 | 0.0158 | 0.0158 | 0.0158 | 0.0158 | 0.0158 | 0.0158          | 0.0158 | 0.0158 | 0.0158 | 0.0158 | 0.0158 | 0.0158 | 0.0158 | 0.0158 | 0.0158 |  |
| 0.6996         | 0.6468 | 0.0316 | 0.0316 | 0.2897 | 0.1862 | 0.0206 | 0.0206 | 0.0206 | 0.0206 | 0.0206 | 0.0206 | 0.0206 | 0.0206          | 0.0206 | 0.0206 | 0.0206 | 0.0206 | 0.0206 | 0.0206 | 0.0206 | 0.0206 |        |  |
| 0.6114         | 0.7099 | 0.0338 | 0.0338 | 0.2926 | 0.1680 | 0.1992 | 0.0222 | 0.0225 | 0.0156 | 0.0000 | 0.0000 | 1.1325 | 0.0204          | 0.3123 | 0.1470 | 0.0782 | 0.3685 | 0.0385 | 0.1029 | 0.4267 | 0.5267 |        |  |
| 0.6665         | 0.6794 | 0.0373 | 0.0373 | 0.2623 | 0.1828 | 0.1119 | 0.0194 | 0.0262 | 0.0173 | 0.0000 | 0.0000 | 1.3213 | 0.0211          | 0.3879 | 0.1356 | 0.0728 | 0.3925 | 0.0333 | 0.0338 | 0.4816 | 0.4816 |        |  |
| 0.6358         | 0.7177 | 0.0351 | 0.0351 | 0.2429 | 0.1646 | 0.1699 | 0.0376 | 0.0207 | 0.0244 | 0.0154 | 0.0000 | 1.5308 | 0.0208          | 0.3767 | 0.1386 | 0.0776 | 0.3982 | 0.0326 | 0.0225 | 0.4748 | 0.4748 |        |  |
| 0.6628         | 0.7026 | 0.0402 | 0.0393 | 0.2627 | 0.2201 | 0.1192 | 0.0192 | 0.0266 | 0.0000 | 0.0000 | 0.0000 | 1.7206 | 0.0210          | 0.2484 | 0.1225 | 0.0786 | 0.4801 | 0.0331 | 0.0956 | 0.5042 | 0.5042 |        |  |
| 0.6911         | 0.6376 | 0.0394 | 0.0201 | 0.2176 | 0.1774 | 0.1029 | 0.0166 | 0.0136 | 0.0247 | 0.0000 | 0.0000 | 1.1325 | 0.0210          | 0.2484 | 0.1225 | 0.0786 | 0.4801 | 0.0331 | 0.0956 | 0.5042 | 0.5042 |        |  |
| 0.7363         | 0.6882 | 0.0314 | 0.0289 | 0.2167 | 0.2276 | 0.1224 | 0.0224 | 0.0209 | 0.0217 | 0.0000 | 0.0000 | 1.5308 | 0.0211          | 0.2388 | 0.1398 | 0.0859 | 0.3043 | 0.0371 | 0.0867 | 0.4116 | 0.4116 |        |  |
| 0.6750         | 0.7095 | 0.0474 | 0.0192 | 0.2640 | 0.2511 | 0.1196 | 0.0216 | 0.0234 | 0.0238 | 0.0000 | 0.0000 | 1.3213 | 0.0210          | 0.2484 | 0.1225 | 0.0786 | 0.4801 | 0.0331 | 0.0956 | 0.5042 | 0.5042 |        |  |
| 0.6278         | 0.6018 | 0.0348 | 0.0256 | 0.2681 | 0.2161 | 0.1169 | 0.0244 | 0.0243 | 0.0233 | 0.0000 | 0.0000 | 1.3213 | 0.0210          | 0.2484 | 0.1225 | 0.0786 | 0.4801 | 0.0331 | 0.0956 | 0.5042 | 0.5042 |        |  |
| 0.6262         | 0.6212 | 0.0351 | 0.0278 | 0.2688 | 0.2031 | 0.1169 | 0.0244 | 0.0243 | 0.0233 | 0.0000 | 0.0000 | 1.3213 | 0.0210          | 0.2484 | 0.1225 | 0.0786 | 0.4801 | 0.0331 | 0.0956 | 0.5042 | 0.5042 |        |  |
| 0.6735         | 0.6996 | 0.0473 | 0.0168 | 0.2639 | 0.2471 | 0.1295 | 0.0289 | 0.0248 | 0.0333 | 0.0000 | 0.0000 | 1.7206 | 0.0246          | 0.2781 | 0.1652 | 0.0880 | 0.4662 | 0.0255 | 0.1297 | 0.5262 | 0.5262 |        |  |
| 0.6070         | 0.6833 | 0.0460 | 0.0217 | 0.2678 | 0.2488 | 0.1174 | 0.0234 | 0.0243 | 0.0239 | 0.0000 | 0.0000 | 1.6936 | 0.0246          | 0.2782 | 0.1652 | 0.0882 | 0.4831 | 0.0211 | 0.1116 | 0.6029 | 0.6029 |        |  |

**Amino acids consumption during fermentation**

| Mean            | N <sub>10</sub> | N <sub>14</sub> | N <sub>1</sub> | EF     |
|-----------------|-----------------|-----------------|----------------|--------|
| Ala             | 1.22            | 4.41            | 10.89          | 0.58   |
| Arg             | 9.66            | 18.53           | 37.05          | 0.50   |
| Asp             | 1.24            | 1.64            | 1.77           | 1.75   |
| Asn             | 0.06            | 0.07            | 0.17           | 0.28   |
| Cys             | 21.91           | 29.27           | 39.11          | 0.25   |
| Gln             | 2.28            | 3.78            | 5.25           | 5.25   |
| Glu             | n.d.            | n.d.            | 1.59           | 1.43   |
| Gly             | n.d.            | n.d.            | 1.22           | 1.82   |
| His             | 0.99            | 1.82            | 1.82           | 0.00   |
| Ile             | 1.28            | 1.60            | 1.63           | 1.63   |
| Leu             | 2.10            | 2.37            | 2.42           | 2.41   |
| Lys             | 1.85            | 1.85            | 1.85           | 0.00   |
| Met             | 1.22            | 1.23            | 1.22           | 1.22   |
| NH <sub>4</sub> | 34.9            | 55.5            | 56.6           | 56.6   |
| Pro             | 1.16            | 1.44            | 1.50           | 1.49   |
| Ser             | 2.77            | 3.98            | 4.68           | 4.68   |
| Thr             | 1.16            | 1.44            | 1.50           | 1.49   |
| Trp             | 0.16            | 0.28            | 0.64           | 0.64   |
| Tyr             | 1.12            | 1.84            | 2.50           | 2.50   |
| Val             | 1.22            | 1.23            | 1.22           | 1.22   |
| NaN             | 87.26           | 134.37          | 175.64         | 175.51 |

| SEM             | N <sub>10</sub> | N <sub>14</sub> | N <sub>1</sub> | EF   |
|-----------------|-----------------|-----------------|----------------|------|
| Ala             | 0.14            | 0.31            | 0.00           | 0.02 |
| Arg             | 0.31            | 0.60            | 0.00           | 0.00 |
| Asp             | 0.03            | 0.02            | 0.00           | 0.00 |
| Asn             | 0.01            | 0.01            | 0.01           | 0.01 |
| Cys             | 0.05            | 0.09            | 0.01           | 0.00 |
| Gln             | 0.13            | 0.14            | 0.00           | 0.00 |
| Glu             | n.d.            | n.d.            | 0.00           | 0.02 |
| Gly             | n.d.            | n.d.            | 0.00           | 0.07 |
| His             | 0.07            | 0.07            | 0.00           | 0.00 |
| Ile             | 0.04            | 0.01            | 0.00           | 0.00 |
| Leu             | 0.02            | 0.02            | 0.01           | 0.01 |
| Lys             | 0.07            | 0.05            | 0.00           | 0.00 |
| Met             | 0.00            | 0.00            | 0.01           | 0.00 |
| NH <sub>4</sub> | 1.0             | 0.6             | 0.0            | 0.0  |
| Pro             | 0.03            | 0.02            | 0.00           | 0.00 |
| Ser             | 0.07            | 0.08            | 0.00           | 0.00 |
| Thr             | 0.03            | 0.04            | 0.00           | 0.00 |
| Trp             | 0.01            | 0.01            | 0.00           | 0.00 |
| Tyr             | 0.02            | 0.02            | 0.00           | 0.00 |
| Val             | 0.07            | 0.05            | 0.00           | 0.00 |
| NaN             | 3.01            | 3.42            | 0.04           | 0.08 |

\*Calculated by multiplying the millimolar concentration of a proteogenic amino acid by the number of nitrogen atoms that are provided through the catabolism of this molecule and by the atomic mass of nitrogen (14).

| Mean            | N <sub>10</sub> | N <sub>14</sub> | N <sub>1</sub> | EF    |
|-----------------|-----------------|-----------------|----------------|-------|
| Ala             | 7.8             | 28.2            | 66.7           | 66.4  |
| Arg             | 40.0            | 76.8            | 151.5          | 151.5 |
| Asp             | 11.8            | 15.6            | 16.6           | 16.6  |
| Cys             | 0.5             | 0.6             | 1.5            | 2.4   |
| Gln             | 14.2            | 15.29           | 20.91          | 20.91 |
| Glu             | 24.0            | 39.7            | 53.1           | 53.1  |
| Gly             | n.d.            | n.d.            | 8.5            | 7.7   |
| His             | 11.0            | 14.6            | 14.6           | 14.6  |
| Ile             | 12.0            | 15.0            | 15.3           | 15.3  |
| Leu             | 20.7            | 29.8            | 35.1           | 35.1  |
| Lys             | 7.0             | 7.1             | 7.1            | 7.1   |
| Met             | 13.0            | 13.0            | 13.0           | 13.0  |
| NH <sub>4</sub> | 34.9            | 55.5            | 56.6           | 56.6  |
| Pro             | 11.7            | 17.0            | 17.0           | 17.0  |
| Ser             | 20.7            | 29.8            | 35.1           | 35.1  |
| Thr             | 26.1            | 32.6            | 35.5           | 35.5  |
| Trp             | 11.7            | 26.7            | 90.6           | 90.7  |
| Tyr             | 2.0             | 3.6             | 8.2            | 8.2   |
| Val             | 9.4             | 16.2            | 20.9           | 20.9  |

| SEM             | N <sub>10</sub> | N <sub>14</sub> | N <sub>1</sub> | EF  |
|-----------------|-----------------|-----------------|----------------|-----|
| Ala             | 0.9             | 2.0             | 0.0            | 0.1 |
| Arg             | 3.7             | 5.8             | 0.0            | 0.0 |
| Asp             | 0.3             | 0.2             | 0.0            | 0.0 |
| Cys             | 0.1             | 0.1             | 0.1            | 0.1 |
| Gln             | 1.3             | 2.5             | 0.0            | 0.0 |
| Glu             | 1.4             | 1.5             | 0.0            | 0.0 |
| Gly             | 0.2             | 0.1             | 0.0            | 0.0 |
| His             | 0.2             | 0.0             | 0.0            | 0.0 |
| Ile             | 0.0             | 0.0             | 0.0            | 0.0 |
| Leu             | 0.0             | 0.0             | 0.0            | 0.0 |
| Lys             | 0.0             | 0.0             | 0.0            | 0.0 |
| Met             | 0.0             | 0.0             | 0.1            | 0.0 |
| NH <sub>4</sub> | 1.0             | 0.6             | 0.0            | 0.0 |
| Pro             | 0.3             | 0.3             | 0.0            | 0.2 |
| Ser             | 0.6             | 0.6             | 0.0            | 0.0 |
| Thr             | 0.4             | 0.3             | 0.0            | 0.0 |
| Trp             | 0.3             | 2.5             | 0.0            | 0.0 |
| Tyr             | 0.0             | 0.3             | 0.0            | 0.0 |
| Val             | 0.5             | 0.4             | 0.0            | 0.0 |

| Mean | N <sub>10</sub> | N <sub>14</sub> | N <sub>1</sub> | EF    |
|------|-----------------|-----------------|----------------|-------|
| Ala  | 0.087           | 0.317           | 0.749          | 0.746 |
| Arg  | 0               |                 |                |       |

**Dataset S2: Raw data : amino acids in biomass hydrolysate (mM)**

**Raw data : biomass production (g.L<sup>-1</sup>) and proteins content (g proteins/g DW)**

Means, standard deviations and standard errors of the mean were calculated from 8 independent experiments.

|                             |                  | nmol.mL <sup>-1</sup> |       |       |       |       |       |       |       |       |       |       |       |       |       |        |       |       |       |       |       |                             |        |
|-----------------------------|------------------|-----------------------|-------|-------|-------|-------|-------|-------|-------|-------|-------|-------|-------|-------|-------|--------|-------|-------|-------|-------|-------|-----------------------------|--------|
|                             |                  | Ala                   | Arg   | Asp   | Asn   | Cys   | Glu   | Gln   | Gly   | His   | Ile   | Leu   | Lys   | Met   | Phe   | Pro    | Ser   | Trp   | Thr   | Tyr   | Val   |                             |        |
| N <sub>1/2</sub>            | N <sub>1/2</sub> | 235.9                 | 79.7  | 152.8 | 49.2  | 60.4  | 151.8 | 53.1  | 188.3 | 42.6  | 81.5  | 188.2 | 35.8  | 33.4  | 78.4  | 203.1  | 161.2 | 125.0 | 15.6  | 47.8  | 119.0 | Total (mg.L <sup>-1</sup> ) | 259.2  |
|                             | N <sub>1/4</sub> | 216.8                 | 73.2  | 140.4 | 45.2  | 55.5  | 139.5 | 48.8  | 173.1 | 39.1  | 74.9  | 173.0 | 32.9  | 30.7  | 72.0  | 186.6  | 148.2 | 114.9 | 14.3  | 43.9  | 109.4 | Dry weight                  | 0.8890 |
|                             | N <sub>1</sub>   | 221.3                 | 77.4  | 134.4 | 43.3  | 63.2  | 155.7 | 54.4  | 168.2 | 35.9  | 82.4  | 156.5 | 32.1  | 53.0  | 71.5  | 239.5  | 137.6 | 114.0 | 15.5  | 56.5  | 78.2  | Proteins                    | 0.8993 |
|                             | EF               | 252.5                 | 85.9  | 158.3 | 51.0  | 41.2  | 175.5 | 61.3  | 208.8 | 48.7  | 84.9  | 211.2 | 40.4  | 21.9  | 86.9  | 209.0  | 177.0 | 138.7 | 15.9  | 46.6  | 118.8 |                             | 0.7735 |
|                             |                  | 189.9                 | 65.8  | 132.5 | 42.7  | 60.7  | 104.4 | 36.5  | 152.2 | 33.7  | 67.3  | 162.2 | 29.0  | 24.4  | 67.4  | 153.8  | 137.4 | 107.5 | 13.4  | 38.4  | 130.1 |                             | 0.7933 |
|                             |                  | 260.5                 | 93.8  | 182.3 | 58.7  | 93.2  | 130.1 | 45.5  | 209.4 | 47.3  | 91.8  | 223.8 | 41.2  | 51.1  | 91.3  | 213.1  | 190.5 | 145.7 | 18.2  | 50.9  | 190.1 |                             | 0.8527 |
|                             |                  | 235.9                 | 69.4  | 169.0 | 54.5  | 59.7  | 184.1 | 64.3  | 180.2 | 42.3  | 76.9  | 164.9 | 31.6  | 26.9  | 67.8  | 182.3  | 153.4 | 108.1 | 14.5  | 43.3  | 75.8  |                             | 0.8033 |
|                             |                  | 198.3                 | 67.1  | 107.2 | 34.5  | 33.5  | 122.6 | 42.8  | 165.1 | 37.3  | 66.2  | 166.3 | 31.8  | 18.0  | 66.6  | 169.8  | 134.0 | 106.3 | 12.4  | 38.7  | 96.8  |                             | 0.8333 |
| N <sub>1/4</sub>            | N <sub>1/4</sub> | 295.8                 | 98.2  | 169.5 | 54.6  | 89.0  | 157.1 | 54.9  | 237.5 | 52.6  | 99.6  | 258.3 | 43.4  | 46.7  | 98.8  | 246.9  | 213.3 | 158.3 | 20.4  | 62.6  | 135.9 |                             | 3.1815 |
|                             | N <sub>1/4</sub> | 358.1                 | 118.8 | 205.3 | 66.1  | 107.8 | 190.2 | 66.5  | 287.6 | 63.7  | 120.6 | 312.7 | 52.6  | 56.5  | 119.6 | 298.9  | 258.2 | 191.7 | 24.7  | 75.8  | 164.5 |                             | 1.4941 |
|                             | N <sub>1</sub>   | 316.8                 | 109.3 | 150.9 | 48.6  | 101.6 | 196.4 | 68.6  | 252.5 | 54.3  | 121.6 | 274.0 | 44.7  | 67.6  | 111.8 | 264.4  | 212.4 | 179.2 | 23.1  | 83.7  | 104.9 |                             | 1.3744 |
|                             | EF               | 295.7                 | 92.0  | 126.2 | 40.7  | 61.5  | 128.0 | 44.7  | 247.5 | 52.0  | 97.0  | 265.8 | 47.7  | 30.3  | 95.8  | 265.2  | 208.4 | 153.4 | 18.4  | 56.9  | 138.1 |                             | 1.3719 |
|                             |                  | 318.4                 | 108.3 | 194.8 | 62.8  | 104.4 | 146.5 | 51.2  | 254.6 | 55.9  | 107.0 | 283.4 | 50.3  | 69.7  | 106.8 | 259.4  | 233.1 | 171.1 | 22.1  | 54.3  | 199.8 |                             | 1.3732 |
|                             |                  | 330.2                 | 109.6 | 205.3 | 66.2  | 162.1 | 155.8 | 54.5  | 263.9 | 58.4  | 106.5 | 297.9 | 50.3  | 48.4  | 109.4 | 277.2  | 244.0 | 175.4 | 22.8  | 71.8  | 186.6 |                             | 1.2936 |
|                             |                  | 295.4                 | 96.7  | 191.8 | 61.8  | 79.0  | 188.5 | 65.9  | 231.6 | 52.7  | 101.2 | 235.3 | 41.5  | 54.7  | 94.0  | 234.5  | 212.5 | 150.6 | 21.8  | 61.4  | 101.6 |                             | 1.3894 |
|                             |                  | 348.2                 | 117.6 | 230.7 | 74.3  | 71.1  | 197.6 | 69.1  | 278.5 | 65.8  | 107.5 | 308.6 | 44.1  | 30.4  | 119.6 | 287.3  | 265.4 | 191.6 | 23.2  | 76.1  | 148.8 |                             | 1.4068 |
| N <sub>1</sub>              | N <sub>1</sub>   | 1039.4                | 342.8 | 721.6 | 232.5 | 237.2 | 659.7 | 230.6 | 815.3 | 174.2 | 364.1 | 832.8 | 145.6 | 161.3 | 371.2 | 837.8  | 785.3 | 585.1 | 66.9  | 223.7 | 521.9 |                             | 1153.3 |
|                             | N <sub>1/4</sub> | 922.5                 | 304.3 | 640.4 | 206.3 | 210.5 | 585.5 | 204.7 | 723.6 | 154.6 | 323.1 | 739.2 | 129.3 | 143.1 | 329.4 | 743.6  | 697.0 | 519.3 | 59.4  | 198.5 | 463.2 |                             | 1.1484 |
|                             | N <sub>1</sub>   | 961.7                 | 318.6 | 508.4 | 163.8 | 242.1 | 680.2 | 237.8 | 761.5 | 162.4 | 342.0 | 762.1 | 133.7 | 239.2 | 328.3 | 774.8  | 688.2 | 517.5 | 59.6  | 264.4 | 306.0 |                             | 1.4603 |
|                             | EF               | 1023.9                | 339.5 | 642.3 | 206.9 | 144.6 | 635.8 | 222.2 | 823.2 | 166.9 | 365.0 | 863.5 | 144.2 | 118.5 | 398.2 | 895.3  | 763.6 | 627.7 | 63.6  | 231.5 | 486.6 |                             | 1.0249 |
|                             |                  | 996.5                 | 324.6 | 756.5 | 243.7 | 285.7 | 490.6 | 171.5 | 771.2 | 161.7 | 314.7 | 804.4 | 141.1 | 116.5 | 350.6 | 791.2  | 785.0 | 552.7 | 64.0  | 199.4 | 651.4 |                             | 1.0995 |
|                             |                  | 1136.2                | 365.7 | 783.7 | 252.5 | 195.5 | 486.9 | 163.9 | 867.4 | 184.5 | 362.1 | 915.2 | 160.6 | 78.0  | 370.4 | 887.1  | 889.4 | 583.8 | 72.1  | 198.4 | 836.3 |                             | 1.1893 |
|                             |                  | 1060.7                | 339.5 | 865.4 | 278.8 | 430.2 | 901.0 | 314.9 | 845.3 | 180.8 | 437.0 | 779.2 | 142.7 | 286.8 | 357.0 | 804.7  | 810.6 | 562.8 | 77.7  | 221.9 | 390.9 |                             | 1.2554 |
|                             |                  | 878.1                 | 306.0 | 654.5 | 214.1 | 109.2 | 658.9 | 230.3 | 682.8 | 157.6 | 305.8 | 720.2 | 125.6 | 105.5 | 350.0 | 720.7  | 647.0 | 551.7 | 54.3  | 181.5 | 389.5 |                             | 999.6  |
| EF                          | N <sub>1/2</sub> | 972.5                 | 338.7 | 718.6 | 231.5 | 369.1 | 515.3 | 180.1 | 821.8 | 179.3 | 345.8 | 810.6 | 148.5 | 114.1 | 354.7 | 890.8  | 800.9 | 587.7 | 66.9  | 213.7 | 686.8 |                             | 1145.6 |
|                             | N <sub>1/4</sub> | 998.7                 | 347.9 | 738.0 | 237.8 | 379.1 | 529.2 | 185.0 | 844.0 | 184.1 | 355.1 | 832.5 | 152.6 | 117.2 | 364.3 | 914.8  | 822.5 | 603.6 | 68.7  | 219.4 | 705.3 |                             | 1176.6 |
|                             | N <sub>1</sub>   | 884.3                 | 381.8 | 816.1 | 263.0 | 329.6 | 565.3 | 197.6 | 893.5 | 197.3 | 378.5 | 889.0 | 161.5 | 115.4 | 388.3 | 1123.1 | 906.7 | 643.3 | 74.7  | 266.5 | 722.9 |                             | 1257.7 |
|                             | EF               | 1040.4                | 340.1 | 715.1 | 230.4 | 302.5 | 539.6 | 188.6 | 796.2 | 190.9 | 369.1 | 825.5 | 152.1 | 124.6 | 403.2 | 807.6  | 772.6 | 668.0 | 63.9  | 204.7 | 787.1 |                             | 1169.5 |
|                             |                  | 1219.2                | 403.3 | 868.3 | 279.8 | 465.6 | 546.6 | 191.1 | 956.6 | 213.8 | 424.8 | 960.1 | 178.9 | 118.9 | 397.0 | 927.7  | 934.0 | 657.8 | 79.9  | 275.9 | 972.9 |                             | 1358.5 |
|                             |                  | 1078.6                | 346.4 | 745.4 | 240.2 | 668.9 | 484.8 | 169.4 | 850.2 | 177.5 | 375.7 | 845.8 | 152.8 | 109.8 | 347.1 | 838.3  | 838.0 | 575.1 | 71.5  | 176.0 | 751.9 |                             | 1198.5 |
|                             |                  | 952.5                 | 371.6 | 834.4 | 268.8 | 394.8 | 526.2 | 183.9 | 932.6 | 199.6 | 365.2 | 891.3 | 164.6 | 120.0 | 389.2 | 930.2  | 644.8 | 608.8 | 237.1 | 175.1 | 757.1 |                             | 1275.7 |
|                             |                  | 1192.0                | 377.6 | 734.7 | 236.7 | 272.9 | 707.6 | 247.3 | 958.3 | 195.6 | 352.0 | 900.5 | 163.8 | 118.4 | 395.5 | 983.6  | 870.4 | 655.2 | 68.0  | 245.1 | 516.7 |                             | 1248.1 |
| Means from 8 replicates     |                  |                       |       |       |       |       |       |       |       |       |       |       |       |       |       |        |       |       |       |       |       |                             |        |
|                             |                  | Ala                   | Arg   | Asp   | Asn   | Cys   | Glu   | Gln   | Gly   | His   | Ile   | Leu   | Lys   | Met   | Phe   | Pro    | Ser   | Trp   | Thr   | Tyr   | Val   |                             |        |
| N <sub>1/2</sub>            | N <sub>1/2</sub> | 226                   | 77    | 147   | 47    | 58    | 145   | 51    | 181   | 41    | 78    | 181   | 34    | 32    | 75    | 195    | 155   | 120   | 15    | 46    | 115   | N <sub>1/2</sub>            | 0.8336 |
| N <sub>1/4</sub>            | N <sub>1/4</sub> | 320                   | 106   | 184   | 59    | 97    | 170   | 59    | 257   | 57    | 108   | 279   | 47    | 51    | 107   | 267    | 231   | 171   | 22    | 68    | 148   | N <sub>1/4</sub>            | 1.3869 |
| N <sub>1</sub>              | N <sub>1</sub>   | 1002                  | 330   | 698   | 225   | 232   | 635   | 222   | 786   | 168   | 352   | 802   | 140   | 156   | 357   | 807    | 758   | 563   | 65    | 215   | 506   | N <sub>1</sub>              | 3.3610 |
| EF                          | EF               | 1042                  | 363   | 771   | 249   | 395   | 552   | 193   | 882   | 192   | 371   | 869   | 150   | 128   | 380   | 956    | 859   | 629   | 72    | 230   | 738   | EF                          | 3.3937 |
| Standard deviations         |                  |                       |       |       |       |       |       |       |       |       |       |       |       |       |       |        |       |       |       |       |       |                             |        |
|                             |                  | Ala                   | Arg   | Asp   | Asn   | Cys   | Glu   | Gln   | Gly   | His   | Ile   | Leu   | Lys   | Met   | Phe   | Pro    | Ser   | Trp   | Thr   | Tyr   | Val   |                             |        |
| N <sub>1/2</sub>            | N <sub>1/2</sub> | 24.7                  | 9.7   | 23.6  | 7.6   | 17.6  | 26.8  | 9.4   | 20.5  | 5.3   | 8.7   | 24.5  | 4.4   | 13.0  | 9.4   | 27.1   | 20.3  | 15.0  | 1.8   | 6.1   | 36.2  | N <sub>1/2</sub>            | 0.0447 |
| N <sub>1/4</sub>            | N <sub>1/4</sub> | 24.3                  | 9.8   | 33.6  | 10.8  | 31.1  | 26.4  | 9.2   | 19.2  | 5.3   | 9.1   | 26.5  | 3.9   | 14.9  | 10.1  | 20.9   | 22.7  | 16.1  | 1.9   | 10.5  | 35.3  | N <sub>1/4</sub>            | 0.0550 |
| N <sub>1</sub>              | N <sub>1</sub>   | 81.7                  | 20.8  | 108.8 | 35.0  | 97.7  | 133.6 | 46.7  | 62.9  | 10.9  | 41.6  | 65.8  | 11.0  | 17.5  | 23.2  | 63.2   | 77.9  | 36.5  | 7.5   | 26.1  | 168.8 | N <sub>1</sub>              | 0.1043 |
| EF                          | EF               | 116.4                 | 23.5  | 59.1  | 19.0  | 123.2 | 67.2  | 23.5  | 62.7  | 12.0  | 24.7  | 49.8  | 10.0  | 16.4  | 21.3  | 127.8  | 60.6  | 35.2  | 6.2   | 33.0  | 125.9 | EF                          | 0.1020 |
| Standard errors of the mean |                  |                       |       |       |       |       |       |       |       |       |       |       |       |       |       |        |       |       |       |       |       |                             |        |
|                             |                  | Ala                   | Arg   | Asp   | Asn   | Cys   | Glu   | Gln   | Gly   | His   | Ile   | Leu   | Lys   | Met   | Phe   | Pro    | Ser   | Trp   | Thr   | Tyr   | Val   |                             |        |
| N <sub>1/2</sub>            | N <sub>1/2</sub> | 8.7                   | 3.4   | 8.3   | 2.7   | 6.2   | 9.5   | 3.3   | 7.2   | 1.9   | 3.1   | 8.7   | 1.6   | 4.6   | 3.3   | 9.6    | 7.2   | 5.3   | 0.6   | 2.2   | 12.8  | N <sub>1/2</sub>            | 0.0158 |
| N <sub>1/4</sub>            | N <sub>1/4</sub> | 8.6                   | 3.5   | 11.9  | 3.8   | 11.0  | 9.3   | 3.3   | 6.8   | 1.9   | 3.2   | 9.4   | 1.4   | 5.3   | 3.6   | 7.4    | 8.0   | 5.7   | 0.7   | 3.7   | 12.5  | N <sub>1/4</sub>            | 0.0195 |
| N <sub>1</sub>              | N <sub>1</sub>   | 28.9                  | 7.3   | 38.5  | 12.4  | 34.5  | 47.2  | 16.5  | 22.3  | 3.9   | 14.7  | 23.3  | 3.9   | 25.3  | 8.2   | 22.3   | 27.5  | 12.9  | 2.6   | 9.2   | 59.7  | N <sub>1</sub>              | 0.0369 |
| EF                          | EF               | 41.1                  | 8.3   | 20.9  | 6.7   | 43.6  | 23.8  | 8.3   | 22.2  | 4.2   | 8.7   | 17.6  | 3.5   | 5.8   | 7.5   | 45.2   | 21.4  | 12.5  | 2.2   | 11.7  | 44.5  | EF                          | 0.0361 |
| Molecular weight            |                  |                       |       |       |       |       |       |       |       |       |       |       |       |       |       |        |       |       |       |       |       |                             |        |
|                             |                  | Ala                   | Arg   | Asp   | Asn   | Cys   | Glu   | Gln   | Gly   | His   | Ile   | Leu   | Lys   | Met   | Phe   | Pro    | Ser   | Trp   | Thr   | Tyr   | Val   |                             |        |
|                             |                  | 89                    | 174   | 133   | 132   | 121   | 147   | 146   | 75    | 155   | 131   | 131   | 146   | 149   | 165   | 115    | 105   | 119   | 204   | 181   | 117   |                             |        |

**Raw data : % amino acids in proteins**

The mass percentage of each amino acid in proteins was calculated dividing its amount in mg.L<sup>-1</sup> in the hydrolysate by the total amount of amino acids (sum in mg.L<sup>-1</sup>). Means, standard deviations and standard errors of the mean were calculated from 8 independent experiments.

|                  |                  | Ala    | Arg    | Asp    | Asn    | Cys    | Glu    | Gln    | Gly    | His    | Ile    | Leu    | Lys    | Met    | Phe    | Pro    | Ser    | Trp    | Thr    | Tyr    | Val    |            |        |
|------------------|------------------|--------|--------|--------|--------|--------|--------|--------|--------|--------|--------|--------|--------|--------|--------|--------|--------|--------|--------|--------|--------|------------|--------|
| N <sub>1/2</sub> | N <sub>1/2</sub> | 0.0810 | 0.0535 | 0.0784 | 0.0251 | 0.0282 | 0.0861 | 0.0299 | 0.0545 | 0.0255 | 0.0412 | 0.0951 | 0.0202 | 0.0192 | 0.0499 | 0.0901 | 0.0653 | 0.0574 | 0.0123 | 0.0334 | 0.0537 | Total (%)  | 100    |
|                  | N <sub>1/4</sub> | 0.0812 | 0.0535 | 0.0784 | 0.0251 | 0.0282 | 0.0861 | 0.0299 | 0.0545 | 0.0255 | 0.0412 | 0.0951 | 0.0202 | 0.0192 | 0.0499 | 0.0901 | 0.0653 | 0.0574 | 0.0123 | 0.0334 | 0.0537 | Dry weight | 0.8336 |
|                  | N <sub>1</sub>   | 0.0797 | 0.0545 | 0.0723 | 0.0231 | 0.0309 | 0.0926 | 0.0321 |        |        |        |        |        |        |        |        |        |        |        |        |        |            |        |

**Dataset S3: Proteinogenic amino acids (mg.L<sup>-1</sup>)**

For each amino acid, the proteinogenic concentration (mg.L<sup>-1</sup>) was calculated by multiplying the % of this amino acid in proteins (mg aa.g proteins<sup>-1</sup>) by the proteins fraction in biomass (g proteins.g DW<sup>-1</sup>) and the dry weight content (biomass production) in the medium (g DW.L<sup>-1</sup>). Means, standard deviations and standard errors of the mean were calculated from 8 independent experiments.

|                                                                          | Ala   | Arg  | Asp   | Asn  | Cys  | Glu   | Gln  | Gly  | His  | Ile  | Leu   | Lys  | Met  | Phe  | Pro   | Ser  | Trp  | Thr  | Tyr  | Val   |
|--------------------------------------------------------------------------|-------|------|-------|------|------|-------|------|------|------|------|-------|------|------|------|-------|------|------|------|------|-------|
| <b>N<sub>1/2</sub></b>                                                   | 36.1  | 23.9 | 34.9  | 11.2 | 12.6 | 38.4  | 13.3 | 24.3 | 11.4 | 18.4 | 42.4  | 9.0  | 8.6  | 22.3 | 40.2  | 29.1 | 25.6 | 5.5  | 14.9 | 23.9  |
|                                                                          | 37.1  | 24.5 | 35.9  | 11.5 | 12.9 | 39.4  | 13.7 | 24.9 | 11.7 | 18.9 | 43.5  | 9.2  | 8.8  | 22.8 | 41.2  | 29.9 | 26.3 | 5.6  | 15.3 | 24.6  |
|                                                                          | 30.0  | 20.5 | 27.2  | 8.7  | 11.7 | 34.9  | 12.1 | 19.2 | 8.5  | 16.5 | 31.3  | 7.1  | 12.0 | 18.0 | 42.0  | 22.0 | 20.7 | 4.8  | 15.6 | 13.9  |
|                                                                          | 33.1  | 22.0 | 31.0  | 9.9  | 7.3  | 38.0  | 13.2 | 23.1 | 11.1 | 16.4 | 40.8  | 8.7  | 4.8  | 21.2 | 35.4  | 27.4 | 24.3 | 4.8  | 12.4 | 20.5  |
|                                                                          | 35.0  | 23.7 | 36.5  | 11.7 | 15.2 | 31.8  | 11.0 | 23.7 | 10.8 | 18.3 | 44.0  | 8.8  | 7.5  | 23.1 | 36.7  | 29.9 | 26.5 | 5.7  | 14.4 | 31.5  |
|                                                                          | 29.6  | 20.9 | 31.0  | 9.9  | 14.4 | 24.4  | 8.5  | 20.1 | 9.4  | 15.4 | 37.3  | 7.7  | 9.7  | 19.3 | 31.3  | 25.6 | 22.2 | 4.7  | 11.8 | 28.4  |
|                                                                          | 34.8  | 20.0 | 37.3  | 11.9 | 12.0 | 44.9  | 15.6 | 22.4 | 10.9 | 16.7 | 35.9  | 7.7  | 6.6  | 18.6 | 34.8  | 26.7 | 21.3 | 4.9  | 13.0 | 14.7  |
|                                                                          | 36.2  | 23.9 | 29.2  | 9.3  | 8.3  | 36.9  | 12.8 | 25.4 | 11.9 | 17.8 | 44.6  | 9.5  | 5.5  | 22.5 | 40.0  | 28.8 | 25.9 | 5.2  | 14.4 | 23.2  |
| <b>N<sub>3/4</sub></b>                                                   | 57.9  | 37.6 | 49.6  | 15.9 | 23.7 | 50.8  | 17.6 | 39.2 | 17.9 | 28.7 | 74.5  | 13.9 | 15.3 | 35.9 | 62.5  | 49.3 | 41.5 | 9.1  | 24.9 | 35.0  |
|                                                                          | 60.9  | 39.5 | 52.2  | 16.7 | 24.9 | 53.4  | 18.6 | 41.2 | 18.9 | 30.2 | 78.3  | 14.7 | 16.1 | 37.7 | 65.7  | 51.8 | 43.6 | 9.6  | 26.2 | 36.8  |
|                                                                          | 54.5  | 36.7 | 38.8  | 12.4 | 23.8 | 55.8  | 19.4 | 36.6 | 16.3 | 30.8 | 69.4  | 12.6 | 19.5 | 35.7 | 58.8  | 43.1 | 41.2 | 9.1  | 29.3 | 23.7  |
|                                                                          | 61.1  | 37.1 | 38.9  | 12.5 | 17.3 | 43.7  | 15.2 | 43.1 | 18.7 | 29.5 | 80.8  | 16.2 | 10.5 | 36.7 | 70.8  | 50.8 | 42.4 | 8.7  | 23.9 | 37.5  |
|                                                                          | 53.2  | 35.4 | 48.7  | 15.6 | 23.7 | 40.4  | 14.0 | 35.9 | 16.3 | 26.3 | 69.7  | 13.8 | 19.5 | 33.1 | 56.0  | 46.0 | 38.2 | 8.5  | 18.4 | 43.9  |
|                                                                          | 48.6  | 31.5 | 45.1  | 14.4 | 32.4 | 37.8  | 13.1 | 32.7 | 15.0 | 23.1 | 64.5  | 12.1 | 11.9 | 29.8 | 52.7  | 42.3 | 34.5 | 7.7  | 21.5 | 36.1  |
|                                                                          | 60.0  | 38.4 | 58.2  | 18.6 | 21.8 | 63.2  | 21.9 | 39.6 | 18.6 | 30.2 | 70.3  | 13.8 | 18.6 | 35.4 | 61.5  | 50.9 | 40.9 | 10.2 | 25.4 | 27.1  |
|                                                                          | 61.2  | 40.4 | 60.6  | 19.4 | 17.0 | 57.3  | 19.9 | 41.2 | 20.1 | 27.8 | 79.8  | 12.7 | 8.9  | 38.9 | 65.2  | 55.0 | 45.0 | 9.3  | 27.2 | 34.4  |
| <b>N<sub>T</sub></b>                                                     | 87.5  | 56.5 | 90.8  | 29.0 | 27.2 | 91.8  | 31.9 | 57.9 | 25.6 | 45.1 | 103.3 | 20.1 | 22.7 | 58.0 | 91.2  | 78.0 | 65.9 | 12.9 | 38.3 | 57.8  |
|                                                                          | 96.4  | 62.2 | 100.0 | 32.0 | 29.9 | 101.1 | 35.1 | 63.7 | 28.1 | 49.7 | 113.7 | 22.2 | 25.0 | 63.8 | 100.4 | 85.9 | 72.6 | 14.2 | 42.2 | 63.6  |
|                                                                          | 95.9  | 62.1 | 75.8  | 24.2 | 32.8 | 112.1 | 38.9 | 64.0 | 28.2 | 50.2 | 111.9 | 21.9 | 39.9 | 60.7 | 99.9  | 81.0 | 69.0 | 13.6 | 53.6 | 40.1  |
|                                                                          | 98.4  | 63.8 | 92.2  | 29.5 | 18.9 | 100.9 | 35.0 | 66.6 | 27.9 | 51.6 | 122.1 | 22.7 | 19.1 | 70.9 | 111.1 | 86.5 | 80.6 | 14.0 | 45.2 | 61.5  |
|                                                                          | 93.9  | 59.8 | 106.5 | 34.1 | 36.6 | 76.3  | 26.5 | 61.2 | 26.5 | 43.6 | 111.5 | 18.8 | 18.4 | 61.2 | 96.3  | 87.3 | 69.6 | 13.8 | 38.2 | 80.7  |
|                                                                          | 103.4 | 65.1 | 106.6 | 34.1 | 24.2 | 70.5  | 24.5 | 66.5 | 29.2 | 48.5 | 122.6 | 24.0 | 11.9 | 62.5 | 104.3 | 95.5 | 71.0 | 15.0 | 36.7 | 100.0 |
|                                                                          | 90.0  | 56.3 | 109.7 | 35.1 | 49.6 | 126.3 | 43.8 | 60.4 | 26.7 | 54.6 | 97.3  | 19.9 | 40.7 | 56.2 | 88.2  | 81.1 | 63.9 | 15.1 | 38.3 | 43.6  |
|                                                                          | 92.2  | 62.8 | 104.3 | 33.3 | 15.6 | 114.3 | 39.7 | 60.4 | 28.8 | 47.3 | 111.3 | 21.6 | 18.5 | 68.1 | 97.8  | 80.1 | 77.5 | 13.1 | 38.7 | 53.8  |
| <b>Means from 8 replicates</b>                                           |       |      |       |      |      |       |      |      |      |      |       |      |      |      |       |      |      |      |      |       |
|                                                                          | Ala   | Arg  | Asp   | Asn  | Cys  | Glu   | Gln  | Gly  | His  | Ile  | Leu   | Lys  | Met  | Phe  | Pro   | Ser  | Trp  | Thr  | Tyr  | Val   |
| N <sub>1/2</sub>                                                         | 34.0  | 22.4 | 32.9  | 10.5 | 11.8 | 36.1  | 12.5 | 22.9 | 10.7 | 17.3 | 40.0  | 8.5  | 7.9  | 21.0 | 37.7  | 27.4 | 24.1 | 5.2  | 14.0 | 22.6  |
| N <sub>3/4</sub>                                                         | 57.2  | 37.1 | 49.0  | 15.7 | 23.1 | 50.3  | 17.5 | 38.7 | 17.7 | 28.3 | 73.4  | 13.7 | 15.0 | 35.4 | 61.6  | 48.6 | 40.9 | 9.0  | 24.6 | 34.3  |
| N <sub>T</sub>                                                           | 94.7  | 61.1 | 98.2  | 31.4 | 29.3 | 99.1  | 34.4 | 62.6 | 27.6 | 48.8 | 111.7 | 21.8 | 24.5 | 62.7 | 98.7  | 84.4 | 71.3 | 14.0 | 41.4 | 62.6  |
| EF                                                                       | 89.5  | 61.1 | 99.1  | 31.7 | 46.2 | 78.3  | 27.2 | 63.8 | 28.8 | 47.0 | 110.0 | 22.5 | 17.6 | 60.7 | 106.3 | 87.1 | 72.5 | 14.1 | 40.1 | 83.5  |
| <b>Standard deviations</b>                                               |       |      |       |      |      |       |      |      |      |      |       |      |      |      |       |      |      |      |      |       |
|                                                                          | Ala   | Arg  | Asp   | Asn  | Cys  | Glu   | Gln  | Gly  | His  | Ile  | Leu   | Lys  | Met  | Phe  | Pro   | Ser  | Trp  | Thr  | Tyr  | Val   |
| N <sub>1/2</sub>                                                         | 2.8   | 1.8  | 3.7   | 1.2  | 2.7  | 6.0   | 2.1  | 2.2  | 1.2  | 1.2  | 4.7   | 0.9  | 2.3  | 2.1  | 3.7   | 2.7  | 2.4  | 0.4  | 1.4  | 6.1   |
| N <sub>3/4</sub>                                                         | 4.6   | 2.7  | 8.0   | 2.6  | 4.8  | 8.9   | 3.1  | 3.4  | 1.7  | 2.6  | 5.8   | 1.3  | 4.2  | 2.8  | 5.8   | 4.4  | 3.3  | 0.8  | 3.4  | 6.3   |
| N <sub>T</sub>                                                           | 5.0   | 3.3  | 11.4  | 3.6  | 10.7 | 19.0  | 6.6  | 3.1  | 1.3  | 3.5  | 8.5   | 1.3  | 10.5 | 4.9  | 7.2   | 5.6  | 5.6  | 0.8  | 5.7  | 19.6  |
| EF                                                                       | 8.0   | 2.9  | 7.0   | 2.3  | 13.8 | 8.3   | 2.9  | 3.1  | 1.9  | 3.2  | 5.1   | 1.2  | 1.9  | 5.4  | 14.3  | 5.2  | 6.4  | 1.1  | 4.5  | 13.8  |
| <b>Standard errors of the mean</b>                                       |       |      |       |      |      |       |      |      |      |      |       |      |      |      |       |      |      |      |      |       |
|                                                                          | Ala   | Arg  | Asp   | Asn  | Cys  | Glu   | Gln  | Gly  | His  | Ile  | Leu   | Lys  | Met  | Phe  | Pro   | Ser  | Trp  | Thr  | Tyr  | Val   |
| N <sub>1/2</sub>                                                         | 1.0   | 0.6  | 1.3   | 0.4  | 1.0  | 2.1   | 0.7  | 0.8  | 0.4  | 0.4  | 1.7   | 0.3  | 0.8  | 0.7  | 1.3   | 0.9  | 0.8  | 0.1  | 0.5  | 2.2   |
| N <sub>3/4</sub>                                                         | 1.6   | 1.0  | 2.8   | 0.9  | 1.7  | 3.1   | 1.1  | 1.2  | 0.6  | 0.9  | 2.1   | 0.5  | 1.5  | 1.0  | 2.0   | 1.6  | 1.2  | 0.3  | 1.2  | 2.2   |
| N <sub>T</sub>                                                           | 1.8   | 1.2  | 4.0   | 1.3  | 3.8  | 6.7   | 2.3  | 1.1  | 0.4  | 1.2  | 3.0   | 0.5  | 3.7  | 1.7  | 2.5   | 2.0  | 2.0  | 0.3  | 2.0  | 6.9   |
| EF                                                                       | 2.8   | 1.0  | 2.5   | 0.8  | 4.9  | 2.9   | 1.0  | 1.1  | 0.7  | 1.1  | 1.8   | 0.4  | 0.7  | 1.9  | 5.1   | 1.8  | 2.3  | 0.4  | 1.6  | 4.9   |
| <b>Molecular weight</b>                                                  |       |      |       |      |      |       |      |      |      |      |       |      |      |      |       |      |      |      |      |       |
|                                                                          | Ala   | Arg  | Asp   | Asn  | Cys  | Glu   | Gln  | Gly  | His  | Ile  | Leu   | Lys  | Met  | Phe  | Pro   | Ser  | Trp  | Thr  | Tyr  | Val   |
|                                                                          | 89    | 174  | 133   | 132  | 121  | 147   | 146  | 75   | 155  | 131  | 146   | 149  | 165  | 115  | 105   | 119  | 204  | 181  | 117  |       |
| <b>Nitrogen atoms required for the synthesis of 1 mole of amino acid</b> |       |      |       |      |      |       |      |      |      |      |       |      |      |      |       |      |      |      |      |       |
|                                                                          | Ala   | Arg  | Asp   | Asn  | Cys  | Glu   | Gln  | Gly  | His  | Ile  | Leu   | Lys  | Met  | Phe  | Pro   | Ser  | Trp  | Thr  | Tyr  | Val   |
|                                                                          | 1     | 4    | 1     | 2    | 1    | 1     | 2    | 1    | 3    | 1    | 1     | 2    | 1    | 1    | 1     | 1    | 2    | 1    | 1    | 1     |

**Amino acids content in biomass throughout fermentation**

|             |      | N <sub>1/2</sub> | N <sub>3/4</sub> | N <sub>T</sub> | EF    |
|-------------|------|------------------|------------------|----------------|-------|
| <b>Mean</b> | Ala  | 34.0             | 57.2             | 94.7           | 89.5  |
|             | Arg  | 22.4             | 37.1             | 61.1           | 61.1  |
|             | Asp  | 32.9             | 49.0             | 98.2           | 99.1  |
|             | Asn  | 10.5             | 15.7             | 31.4           | 31.7  |
|             | Cys  | 11.8             | 23.1             | 29.3           | 46.2  |
|             | Glu  | 36.1             | 50.3             | 99.1           | 78.3  |
|             | Gln  | 12.5             | 17.5             | 34.4           | 27.2  |
|             | Gly  | 22.9             | 38.7             | 62.6           | 63.8  |
|             | His  | 10.7             | 17.7             | 27.6           | 28.8  |
|             | Ile  | 17.3             | 28.3             | 48.8           | 47.0  |
|             | Leu  | 40.0             | 73.4             | 111.7          | 110.0 |
|             | Lys  | 8.5              | 13.7             | 21.8           | 22.5  |
|             | Met  | 7.9              | 15.0             | 24.5           | 17.6  |
|             | Phe  | 21.0             | 35.4             | 62.7           | 60.7  |
|             | Pro  | 37.7             | 61.6             | 98.7           | 106.3 |
|             | Ser  | 27.4             | 48.6             | 84.4           | 87.1  |
| Trp         | 24.1 | 40.9             | 71.3             | 72.5           |       |
| Thr         | 5.2  | 9.0              | 14.0             | 14.1           |       |
| Tyr         | 14.0 | 24.6             | 41.4             | 40.1           |       |
| Val         | 22.6 | 34.3             | 62.6             | 83.5           |       |
| <b>SEM</b>  | Ala  | 1.00             | 1.64             | 1.76           | 2.81  |
|             | Arg  | 0.63             | 0.97             | 1.15           | 1.02  |
|             | Asp  | 1.32             | 2.83             | 4.02           | 2.49  |
|             | Asn  | 0.42             | 0.91             | 1.29           | 0.80  |
|             | Cys  | 0.97             | 1.71             | 3.80           | 4.88  |
|             | Glu  | 2.13             | 3.14             | 6.73           | 2.92  |
|             | Gln  | 1.74             | 1.09             | 2.34           | 1.01  |
|             | Gly  | 0.78             | 1.21             | 1.11           | 1.10  |
|             | His  | 0.41             | 0.61             | 0.44           | 0.68  |
|             | Ile  | 0.43             | 0.91             | 1.24           | 1.12  |
|             | Leu  | 1.68             | 2.07             | 3.01           | 1.81  |
|             | Lys  | 0.30             | 0.46             | 0.47           | 0.41  |
|             | Met  | 0.83             | 1.47             | 3.70           | 0.68  |
|             | Phe  | 0.73             | 1.00             | 1.74           | 1.89  |
|             | Pro  | 1.32             | 2.04             | 2.55           | 5.06  |
|             | Ser  | 0.95             | 1.57             | 1.98           | 1.84  |
| Trp         | 0.84 | 1.16             | 1.98             | 2.26           |       |
| Thr         | 0.14 | 0.27             | 0.29             | 0.40           |       |
| Tyr         | 0.49 | 1.19             | 2.00             | 1.60           |       |
| Val         | 2.16 | 2.22             | 6.94             | 4.89           |       |
| <b>Mean</b> | Ala  | 0.38             | 0.64             | 1.06           | 1.01  |
|             | Arg  | 0.13             | 0.21             | 0.35           | 0.35  |
|             | Asp  | 0.25             | 0.37             | 0.74           | 0.75  |
|             | Asn  | 0.08             | 0.12             | 0.24           | 0.24  |
|             | Cys  | 0.10             | 0.19             | 0.24           | 0.38  |
|             | Glu  | 0.25             | 0.34             | 0.67           | 0.53  |
|             | Gln  | 0.09             | 0.12             | 0.24           | 0.19  |
|             | Gly  | 0.31             | 0.52             | 0.83           | 0.85  |
|             | His  | 0.07             | 0.11             | 0.18           | 0.19  |
|             | Ile  | 0.13             | 0.22             | 0.37           | 0.36  |
|             | Leu  | 0.31             | 0.56             | 0.85           | 0.84  |
|             | Lys  | 0.06             | 0.09             | 0.15           | 0.15  |
|             | Met  | 0.05             | 0.10             | 0.16           | 0.12  |
|             | Phe  | 0.13             | 0.21             | 0.38           | 0.37  |
|             | Pro  | 0.33             | 0.54             | 0.86           | 0.92  |
|             | Ser  | 0.26             | 0.46             | 0.80           | 0.83  |
| Trp         | 0.20 | 0.34             | 0.60             | 0.61           |       |
| Thr         | 0.03 | 0.04             | 0.07             | 0.07           |       |
| Tyr         | 0.08 | 0.14             | 0.23             | 0.22           |       |
| Val         | 0.19 | 0.29             | 0.54             | 0.71           |       |
| <b>SEM</b>  | Ala  | 0.011            | 0.018            | 0.020          | 0.032 |
|             | Arg  | 0.004            | 0.006            | 0.007          | 0.006 |
|             | Asp  | 0.010            | 0.021            | 0.030          | 0.019 |
|             | Asn  | 0.003            | 0.007            | 0.010          | 0.006 |
|             | Cys  | 0.008            | 0.014            | 0.031          | 0.040 |
|             | Glu  | 0.014            | 0.021            | 0.046          | 0.020 |
|             | Gln  | 0.005            | 0.007            | 0.016          | 0.007 |
|             | Gly  | 0.010            | 0.016            | 0.015          | 0.015 |
|             | His  | 0.003            | 0.004            | 0.003          | 0.004 |
|             | Ile  | 0.003            | 0.007            | 0.009          | 0.009 |

**Dataset S4**

**Raw data: Volatile compounds (mg.L<sup>-1</sup>)**

Means, standard deviations and standard errors of the mean were calculated from 8 independent experiments.

|                        | Isobutanol | Isoamyl alcohol | Propanol |
|------------------------|------------|-----------------|----------|
| <b>N<sub>1/2</sub></b> | 5,4        | 19,1            | 4,3      |
|                        | 5,2        | 18,6            | 4,6      |
|                        | 4,9        | 17,2            | 4,9      |
|                        | 5,5        | 14,1            | 5,0      |
|                        | 5,3        | 18,2            | 4,6      |
|                        | 5,5        | 15,7            | 5,1      |
|                        | 5,7        | 18,1            | 5,2      |
|                        | 5,1        | 15,9            | 5,4      |
| <b>N<sub>3/4</sub></b> | 10,9       | 49,8            | 19,2     |
|                        | 11,3       | 43,1            | 22,1     |
|                        | 10,2       | 43,1            | 20,2     |
|                        | 11,0       | 42,1            | 17,2     |
|                        | 10,1       | 46,1            | 16,2     |
|                        | 9,9        | 47,3            | 17,2     |
|                        | 10,9       | 47,0            | 20,2     |
|                        | 10,8       | 48,0            | 19,7     |
| <b>N<sub>T</sub></b>   | 67,2       | 135,6           | 20,0     |
|                        | 62,2       | 136,2           | 23,1     |
|                        | 61,2       | 133,6           | 23,9     |
|                        | 68,3       | 142,1           | 19,2     |
|                        | 61,1       | 141,3           | 20,0     |
|                        | 69,6       | 140,0           | 20,0     |
|                        | 60,9       | 139,5           | 19,1     |
|                        | 61,3       | 142,2           | 20,6     |
| <b>EF</b>              | 116,2      | 195,1           | 20,3     |
|                        | 112,2      | 198,2           | 21,5     |
|                        | 102,2      | 207,2           | 19,5     |
|                        | 102,1      | 204,2           | 19,5     |
|                        | 104,1      | 205,1           | 22,5     |
|                        | 110,2      | 201,1           | 21,2     |
|                        | 109,3      | 205,6           | 19,5     |
|                        | 111,1      | 207,8           | 19,0     |

**Means from 8 replicates**

|                  | Isobutanol | Isoamyl alcohol | Propanol |
|------------------|------------|-----------------|----------|
| N <sub>1/2</sub> | 5,3        | 17,1            | 4,9      |
| N <sub>3/4</sub> | 10,6       | 45,8            | 19,0     |
| N <sub>T</sub>   | 63,9       | 138,8           | 20,7     |
| EF               | 108,4      | 203,0           | 20,4     |

**Standard deviations**

|                  | Isobutanol | Isoamyl alcohol | Propanol |
|------------------|------------|-----------------|----------|
| N <sub>1/2</sub> | 0,2        | 1,7             | 0,4      |
| N <sub>3/4</sub> | 0,5        | 2,7             | 2,0      |
| N <sub>T</sub>   | 3,7        | 3,2             | 1,8      |
| EF               | 5,1        | 4,5             | 1,3      |

**Standard errors of the mean**

|                  | Isobutanol | Isoamyl alcohol | Propanol |
|------------------|------------|-----------------|----------|
| N <sub>1/2</sub> | 0,1        | 0,6             | 0,1      |
| N <sub>3/4</sub> | 0,2        | 1,0             | 0,7      |
| N <sub>T</sub>   | 1,3        | 1,1             | 0,6      |
| EF               | 1,8        | 1,6             | 0,4      |

**Molecular weight**

|  | Isobutanol | Isoamyl alcohol | Propanol |
|--|------------|-----------------|----------|
|  | 74         | 88              | 60       |

**Raw data: Volatile compounds (μM)**

|                        | Isobutanol | Isoamyl alcohol | Propanol |
|------------------------|------------|-----------------|----------|
| <b>N<sub>1/2</sub></b> | 73         | 217             | 71       |
|                        | 70         | 211             | 77       |
|                        | 67         | 195             | 82       |
|                        | 75         | 160             | 84       |
|                        | 72         | 206             | 76       |
|                        | 74         | 178             | 85       |
|                        | 77         | 206             | 86       |
|                        | 70         | 181             | 89       |
| <b>N<sub>3/4</sub></b> | 147        | 565             | 319      |
|                        | 153        | 490             | 369      |
|                        | 137        | 490             | 336      |
|                        | 148        | 479             | 286      |
|                        | 136        | 524             | 269      |
|                        | 133        | 538             | 286      |
|                        | 147        | 534             | 336      |
|                        | 146        | 545             | 328      |
| <b>N<sub>T</sub></b>   | 908        | 1541            | 333      |
|                        | 840        | 1547            | 386      |
|                        | 827        | 1519            | 398      |
|                        | 923        | 1615            | 319      |
|                        | 825        | 1605            | 334      |
|                        | 940        | 1590            | 333      |
|                        | 823        | 1585            | 318      |
|                        | 828        | 1615            | 343      |
| <b>EF</b>              | 1571       | 2217            | 338      |
|                        | 1516       | 2252            | 359      |
|                        | 1382       | 2354            | 325      |
|                        | 1380       | 2320            | 324      |
|                        | 1407       | 2331            | 375      |
|                        | 1490       | 2286            | 353      |
|                        | 1477       | 2337            | 326      |
|                        | 1502       | 2361            | 316      |

**Means from 8 replicates**

|                  | Isobutanol | Isoamyl alcohol | Propanol |
|------------------|------------|-----------------|----------|
| N <sub>1/2</sub> | 72         | 194             | 81       |
| N <sub>3/4</sub> | 144        | 521             | 316      |
| N <sub>T</sub>   | 864        | 1577            | 345      |
| EF               | 1466       | 2307            | 339      |

**Standard deviations**

|                  | Isobutanol | Isoamyl alcohol | Propanol |
|------------------|------------|-----------------|----------|
| N <sub>1/2</sub> | 3          | 20              | 6        |
| N <sub>3/4</sub> | 7          | 31              | 33       |
| N <sub>T</sub>   | 50         | 37              | 30       |
| EF               | 69         | 51              | 21       |

**Standard errors of the mean**

|                  | Isobutanol | Isoamyl alcohol | Propanol |
|------------------|------------|-----------------|----------|
| N <sub>1/2</sub> | 1          | 7               | 2        |
| N <sub>3/4</sub> | 3          | 11              | 12       |
| N <sub>T</sub>   | 18         | 13              | 11       |
| EF               | 24         | 18              | 7        |

**Dataset S5: Raw data: Isotopic enrichment during <sup>15</sup>N-labeling experiments (2 independent experiments)**

Isotopic enrichments that correspond to the labeled fraction of an amino acid with respect to its total amount in proteins were assessed after correction for the natural labeling of raw data (intensities of ions clusters provided by GC-MS analyses) using the IsoCor software.

| Raw data                                     |                  | Ala    | Gly    | Val    | Asp    | Phe    | Leu    | Ile    | Thr    | Ser     | Pro    | Lys    | His    | Glu    | Arg    |
|----------------------------------------------|------------------|--------|--------|--------|--------|--------|--------|--------|--------|---------|--------|--------|--------|--------|--------|
| <sup>4-<sup>15</sup>N</sup> Arg              | N <sub>1/2</sub> | 2.0%   | 2.9%   | 2.2%   | 1.7%   | 1.9%   | 1.9%   | 0.2%   | 0.7%   | 2.3%    | 6.1%   | 1.8%   | 7.7%   | 1.0%   | 98.7%  |
|                                              | N <sub>3/4</sub> | 2.0%   | 3.8%   | 2.2%   | 1.8%   | 2.2%   | 1.9%   | 0.2%   | 0.5%   | 0.7%    | 5.9%   | 1.8%   | 7.6%   | 1.0%   | 97.6%  |
|                                              | N <sub>1</sub>   | 3.1%   | 2.7%   | 2.6%   | 2.2%   | 2.2%   | 2.5%   | 1.0%   | 0.5%   | 0.2%    | 8.7%   | 1.8%   | 1.9%   | 21.6%  | 96.6%  |
|                                              | N <sub>3/4</sub> | 3.4%   | 2.2%   | 2.6%   | 2.6%   | 2.5%   | 2.5%   | 0.4%   | 0.6%   | 1.2%    | 8.7%   | 2.1%   | 2.6%   | 21.5%  | 98.3%  |
|                                              | EF               | 14.9%  | 11.8%  | 14.2%  | 16.5%  | 19.4%  | 15.5%  | 14.4%  | 12.9%  | 15.0%   | 16.1%  | 6.6%   | 5.1%   | 16.4%  | 97.4%  |
| <sup>2-<sup>15</sup>N</sup> Gln              | N <sub>1/2</sub> | 24.8%  | 23.3%  | 25.7%  | 31.8%  | 26.9%  | 22.7%  | 23.8%  | 15.1%  | 18.4%   | 21.9%  | 15.9%  | 12.5%  | 40.8%  | n.d.   |
|                                              | N <sub>3/4</sub> | 24.6%  | 23.5%  | 25.5%  | 32.1%  | 26.8%  | 22.4%  | 23.5%  | 16.1%  | 19.9%   | 22.7%  | 15.2%  | 11.2%  | 41.2%  | n.d.   |
|                                              | N <sub>1</sub>   | 23.9%  | 23.4%  | 24.8%  | 31.3%  | 27.0%  | 23.1%  | 22.9%  | 17.2%  | 18.4%   | 17.4%  | 15.6%  | 8.2%   | 38.6%  | n.d.   |
|                                              | N <sub>3/4</sub> | 23.3%  | 23.3%  | 24.2%  | 30.6%  | 26.3%  | 22.5%  | 21.9%  | 18.3%  | 18.5%   | 17.1%  | 15.1%  | 9.6%   | 38.8%  | n.d.   |
|                                              | EF               | 21.3%  | 24.2%  | 24.3%  | 28.7%  | 25.3%  | 24.0%  | 23.4%  | 22.7%  | 28.7%   | 8.4%   | 15.9%  | 19.0%  | 33.4%  | n.d.   |
| <sup>15</sup> N NH <sub>4</sub> <sup>+</sup> | N <sub>1/2</sub> | 21.2%  | 23.4%  | 23.8%  | 28.8%  | 25.2%  | 24.2%  | 23.4%  | 22.1%  | 23.6%   | 8.5%   | 16.2%  | 16.0%  | 33.3%  | n.d.   |
|                                              | N <sub>3/4</sub> | 22.5%  | 23.3%  | 24.4%  | 29.3%  | 25.7%  | 24.4%  | 24.1%  | 22.3%  | 21.6%   | 7.8%   | 16.3%  | 14.9%  | 32.3%  | n.d.   |
|                                              | N <sub>1</sub>   | 22.1%  | 23.4%  | 24.4%  | 29.4%  | 25.6%  | 24.4%  | 24.2%  | 22.0%  | 25.8%   | 7.8%   | 15.9%  | 15.6%  | 33.3%  | n.d.   |
|                                              | N <sub>3/4</sub> | 35.1%  | 31.1%  | 37.0%  | 47.9%  | 38.7%  | 30.7%  | 34.2%  | 16.6%  | 36.8%   | 31.6%  | 22.1%  | 16.7%  | 45.3%  | n.d.   |
|                                              | EF               | 33.1%  | 31.4%  | 36.2%  | 47.6%  | 37.1%  | 29.5%  | 34.8%  | 18.7%  | 21.4%   | 30.8%  | 20.0%  | 19.0%  | 43.5%  | n.d.   |
| Means from 2 replicates                      |                  |        |        |        |        |        |        |        |        |         |        |        |        |        |        |
| Mean                                         | N <sub>1/2</sub> | 2.0%   | 3.3%   | 2.2%   | 1.7%   | 1.9%   | 1.9%   | 0.2%   | 0.6%   | 1.5%    | 6.0%   | 1.8%   | 7.6%   | 1.0%   | 98.2%  |
|                                              | N <sub>3/4</sub> | 3.3%   | 2.4%   | 2.6%   | 2.4%   | 2.4%   | 2.5%   | 0.7%   | 0.5%   | 0.7%    | 8.7%   | 2.0%   | 2.2%   | 21.6%  | 97.4%  |
|                                              | N <sub>1</sub>   | 14.7%  | 10.9%  | 14.1%  | 16.5%  | 19.5%  | 15.6%  | 14.5%  | 12.6%  | 14.6%   | 16.4%  | 6.4%   | 4.2%   | 16.7%  | 98.1%  |
|                                              | N <sub>3/4</sub> | 15.1%  | 16.2%  | 14.1%  | 16.4%  | 18.1%  | 15.3%  | 14.1%  | 13.2%  | 12.6%   | 16.4%  | 6.2%   | 3.3%   | 17.1%  | 97.0%  |
|                                              | EF               | 24.7%  | 23.4%  | 25.6%  | 32.0%  | 26.9%  | 22.5%  | 23.6%  | 15.6%  | 19.2%   | 22.3%  | 15.5%  | 11.9%  | 41.0%  | n.d.   |
| <sup>2-<sup>15</sup>N</sup> Gln              | N <sub>1/2</sub> | 23.6%  | 23.3%  | 24.5%  | 30.9%  | 26.7%  | 22.8%  | 22.4%  | 17.8%  | 18.4%   | 17.3%  | 15.4%  | 8.9%   | 38.7%  | n.d.   |
|                                              | N <sub>3/4</sub> | 21.3%  | 23.8%  | 24.1%  | 28.7%  | 25.3%  | 24.1%  | 23.4%  | 22.4%  | 26.2%   | 8.4%   | 16.1%  | 17.5%  | 33.4%  | n.d.   |
|                                              | N <sub>1</sub>   | 22.3%  | 23.3%  | 24.4%  | 29.3%  | 25.6%  | 24.4%  | 24.2%  | 22.1%  | 23.7%   | 7.8%   | 16.1%  | 15.2%  | 32.8%  | n.d.   |
|                                              | N <sub>3/4</sub> | 34.1%  | 31.2%  | 36.6%  | 47.8%  | 37.9%  | 30.1%  | 34.5%  | 17.7%  | 29.1%   | 31.2%  | 21.1%  | 17.8%  | 44.4%  | n.d.   |
|                                              | EF               | 33.5%  | 37.4%  | 37.6%  | 50.9%  | 41.5%  | 36.8%  | 32.7%  | 31.6%  | 39.3%   | 20.9%  | 24.3%  | 9.0%   | 46.2%  | n.d.   |
| <sup>15</sup> N NH <sub>4</sub> <sup>+</sup> | N <sub>1/2</sub> | 25.3%  | 28.2%  | 27.7%  | 34.4%  | 28.9%  | 27.2%  | 27.7%  | 22.5%  | 25.7%   | 12.0%  | 19.9%  | 16.7%  | 30.6%  | n.d.   |
|                                              | N <sub>3/4</sub> | 25.6%  | 28.7%  | 27.8%  | 33.5%  | 27.1%  | 26.3%  | 25.7%  | 21.2%  | 23.7%   | 9.9%   | 17.6%  | 17.9%  | 29.9%  | n.d.   |
|                                              | N <sub>1</sub>   | 25.6%  | 28.7%  | 27.8%  | 33.5%  | 27.1%  | 26.3%  | 25.7%  | 21.2%  | 23.7%   | 9.9%   | 17.6%  | 17.9%  | 29.9%  | n.d.   |
|                                              | N <sub>3/4</sub> | 35.1%  | 31.1%  | 37.0%  | 47.9%  | 38.7%  | 30.7%  | 34.2%  | 16.6%  | 36.8%   | 31.6%  | 22.1%  | 16.7%  | 45.3%  | n.d.   |
|                                              | EF               | 33.1%  | 31.4%  | 36.2%  | 47.6%  | 37.1%  | 29.5%  | 34.8%  | 18.7%  | 21.4%   | 30.8%  | 20.0%  | 19.0%  | 43.5%  | n.d.   |
| Standard deviations                          |                  |        |        |        |        |        |        |        |        |         |        |        |        |        |        |
| SD                                           | N <sub>1/2</sub> | 0.051% | 0.583% | 0.004% | 0.060% | 0.207% | 0.035% | 0.049% | 0.161% | 1.103%  | 0.124% | 0.032% | 0.007% | 0.005% | 0.895% |
|                                              | N <sub>3/4</sub> | 0.212% | 0.316% | 0.011% | 0.253% | 0.200% | 0.025% | 0.371% | 0.120% | 0.734%  | 0.035% | 0.205% | 0.460% | 0.072% | 1.211% |
|                                              | N <sub>1</sub>   | 0.244% | 1.287% | 0.064% | 0.067% | 0.157% | 0.046% | 0.138% | 0.410% | 0.643%  | 0.202% | 0.247% | 1.213% | 0.412% | 1.007% |
|                                              | N <sub>3/4</sub> | 0.394% | 0.760% | 0.042% | 0.148% | 0.507% | 0.099% | 0.184% | 1.442% | 1.893%  | 0.421% | 0.163% | 1.379% | 0.663% | 0.846% |
|                                              | EF               | 0.123% | 0.090% | 0.192% | 0.216% | 0.113% | 0.212% | 0.276% | 0.689% | 1.029%  | 0.569% | 0.481% | 0.933% | 0.302% | n.d.   |
| <sup>2-<sup>15</sup>N</sup> Gln              | N <sub>1/2</sub> | 0.417% | 0.077% | 0.430% | 0.491% | 0.488% | 0.403% | 0.704% | 0.785% | 0.071%  | 0.240% | 0.293% | 0.933% | 0.173% | n.d.   |
|                                              | N <sub>3/4</sub> | 0.086% | 0.523% | 0.341% | 0.088% | 0.055% | 0.156% | 0.011% | 0.463% | 3.592%  | 0.081% | 0.258% | 2.132% | 0.124% | n.d.   |
|                                              | N <sub>1</sub>   | 0.325% | 0.101% | 0.021% | 0.067% | 0.039% | 0.018% | 0.078% | 0.237% | 3.016%  | 0.011% | 0.318% | 0.507% | 0.744% | n.d.   |
|                                              | N <sub>3/4</sub> | 1.428% | 0.202% | 0.622% | 0.205% | 1.071% | 0.861% | 0.392% | 1.485% | 10.901% | 0.525% | 1.510% | 1.591% | 1.232% | n.d.   |
|                                              | EF               | 1.657% | 0.456% | 1.161% | 1.299% | 1.821% | 1.442% | 0.207% | 0.859% | 1.120%  | 0.527% | 1.582% | 0.820% | 0.605% | n.d.   |
| <sup>15</sup> N NH <sub>4</sub> <sup>+</sup> | N <sub>1/2</sub> | 0.772% | 0.043% | 0.973% | 0.123% | 0.514% | 0.555% | 0.661% | 1.144% | 1.805%  | 1.342% | 1.209% | 0.148% | 0.039% | n.d.   |
|                                              | N <sub>3/4</sub> | 0.421% | 0.048% | 0.069% | 0.334% | 0.509% | 0.573% | 0.394% | 0.474% | 2.219%  | 0.481% | 0.488% | 1.167% | 0.279% | n.d.   |
|                                              | N <sub>1</sub>   | 0.421% | 0.048% | 0.069% | 0.334% | 0.509% | 0.573% | 0.394% | 0.474% | 2.219%  | 0.481% | 0.488% | 1.167% | 0.279% | n.d.   |
|                                              | N <sub>3/4</sub> | 1.428% | 0.202% | 0.622% | 0.205% | 1.071% | 0.861% | 0.392% | 1.485% | 10.901% | 0.525% | 1.510% | 1.591% | 1.232% | n.d.   |
|                                              | EF               | 1.657% | 0.456% | 1.161% | 1.299% | 1.821% | 1.442% | 0.207% | 0.859% | 1.120%  | 0.527% | 1.582% | 0.820% | 0.605% | n.d.   |
| Standard errors of the mean                  |                  |        |        |        |        |        |        |        |        |         |        |        |        |        |        |
| SEM                                          | N <sub>1/2</sub> | 0.04%  | 0.41%  | 0.00%  | 0.04%  | 0.15%  | 0.03%  | 0.04%  | 0.11%  | 0.78%   | 0.09%  | 0.02%  | 0.01%  | 0.00%  | 0.57%  |
|                                              | N <sub>3/4</sub> | 0.15%  | 0.22%  | 0.01%  | 0.18%  | 0.14%  | 0.02%  | 0.26%  | 0.09%  | 0.52%   | 0.03%  | 0.15%  | 0.33%  | 0.05%  | 0.86%  |
|                                              | N <sub>1</sub>   | 0.17%  | 0.91%  | 0.04%  | 0.05%  | 0.11%  | 0.03%  | 0.10%  | 0.29%  | 0.46%   | 0.14%  | 0.18%  | 0.86%  | 0.29%  | 0.71%  |
|                                              | N <sub>3/4</sub> | 0.28%  | 0.54%  | 0.03%  | 0.11%  | 0.36%  | 0.07%  | 0.13%  | 1.02%  | 1.34%   | 0.30%  | 0.12%  | 0.97%  | 0.47%  | 0.60%  |
|                                              | EF               | 0.09%  | 0.06%  | 0.14%  | 0.15%  | 0.08%  | 0.15%  | 0.20%  | 0.49%  | 0.73%   | 0.40%  | 0.34%  | 0.66%  | 0.21%  | n.d.   |
| <sup>2-<sup>15</sup>N</sup> Gln              | N <sub>1/2</sub> | 0.29%  | 0.05%  | 0.30%  | 0.35%  | 0.35%  | 0.29%  | 0.50%  | 0.55%  | 0.05%   | 0.17%  | 0.21%  | 0.66%  | 0.12%  | n.d.   |
|                                              | N <sub>3/4</sub> | 0.06%  | 0.37%  | 0.24%  | 0.06%  | 0.04%  | 0.11%  | 0.01%  | 0.33%  | 2.54%   | 0.06%  | 0.18%  | 1.51%  | 0.09%  | n.d.   |
|                                              | N <sub>1</sub>   | 0.23%  | 0.07%  | 0.01%  | 0.05%  | 0.03%  | 0.01%  | 0.06%  | 0.17%  | 2.13%   | 0.01%  | 0.23%  | 0.36%  | 0.53%  | n.d.   |
|                                              | N <sub>3/4</sub> | 1.01%  | 0.14%  | 0.44%  | 0.15%  | 0.76%  | 0.61%  | 0.28%  | 1.05%  | 7.71%   | 0.37%  | 1.07%  | 1.13%  | 0.87%  | n.d.   |
|                                              | EF               | 1.17%  | 0.32%  | 0.82%  | 0.92%  | 1.29%  | 1.02%  | 0.15%  | 0.61%  | 0.79%   | 0.37%  | 1.12%  | 0.58%  | 0.43%  | n.d.   |
| <sup>15</sup> N NH <sub>4</sub> <sup>+</sup> | N <sub>1/2</sub> | 0.55%  | 0.03%  | 0.69%  | 0.09%  | 0.36%  | 0.39%  | 0.47%  | 0.81%  | 1.28%   | 0.95%  | 0.86%  | 0.11%  | 0.03%  | n.d.   |
|                                              | N <sub>3/4</sub> | 0.30%  | 0.03%  | 0.05%  | 0.24%  | 0.36%  | 0.41%  | 0.28%  | 0.33%  | 1.57%   | 0.34%  | 0.35%  | 0.82%  | 0.20%  | n.d.   |
|                                              | N <sub>1</sub>   | 0.30%  | 0.03%  | 0.05%  | 0.24%  | 0.36%  | 0.41%  | 0.28%  | 0.33%  | 1.57%   | 0.34%  | 0.35%  | 0.82%  | 0.20%  | n.d.   |
|                                              | N <sub>3/4</sub> | 1.01%  | 0.14%  | 0.44%  | 0.15%  | 0.76%  | 0.61%  | 0.28%  | 1.05%  | 7.71%   | 0.37%  | 1.07%  | 1.13%  | 0.87%  | n.d.   |
|                                              | EF               | 1.17%  | 0.32%  | 0.82%  | 0.92%  | 1.29%  | 1.02%  | 0.15%  | 0.61%  | 0.79%   | 0.37%  | 1.12%  | 0.58%  | 0.43%  | n.d.   |

Dataset S6: Raw data: Isotopic enrichment during <sup>13</sup>C-labeling experiments

Isotopic enrichment

Isotopic enrichments that correspond to the labeled fraction of a molecule with respect to its total amount in proteins or in the medium were assessed after correction for the natural labeling of raw data (intensities of ions clusters provided by GC-MS analyses) using the IsoCor software.

Proteogenic amino acids (4 independent experiments)

| Raw data                        |                  | Gly    | Val    | Leu    | Ile    | Thr    |
|---------------------------------|------------------|--------|--------|--------|--------|--------|
| <sup>13</sup> C-Valine          | N <sub>1/2</sub> | 2.8%   | 25.5%  | 4.5%   | 0.3%   | n.d.   |
|                                 |                  | 2.6%   | 23.6%  | 4.2%   | 0.2%   | n.d.   |
|                                 |                  | 2.8%   | 24.0%  | 4.3%   | 0.2%   | n.d.   |
|                                 |                  | 2.5%   | 23.5%  | 4.1%   | 0.2%   | n.d.   |
|                                 | N <sub>3/4</sub> | 2.9%   | 22.4%  | 5.6%   | 0.3%   | n.d.   |
|                                 |                  | 2.7%   | 22.1%  | 5.4%   | 0.2%   | n.d.   |
|                                 |                  | 2.8%   | 22.8%  | 5.4%   | 0.3%   | n.d.   |
|                                 |                  | 2.6%   | 22.2%  | 5.2%   | 0.2%   | n.d.   |
|                                 | N <sub>T</sub>   | 2.6%   | 14.2%  | 4.2%   | 0.3%   | n.d.   |
|                                 |                  | 2.6%   | 14.1%  | 4.1%   | 0.2%   | n.d.   |
|                                 |                  | 2.6%   | 14.3%  | 4.2%   | 0.3%   | n.d.   |
|                                 |                  | 3.1%   | 14.2%  | 4.1%   | 0.2%   | n.d.   |
|                                 | EF               | 2.2%   | 12.6%  | 3.8%   | 0.3%   | n.d.   |
|                                 |                  | 2.6%   | 12.3%  | 3.7%   | 0.2%   | n.d.   |
|                                 |                  | 2.7%   | 12.8%  | 3.8%   | 0.3%   | n.d.   |
|                                 |                  | 2.5%   | 12.6%  | 3.7%   | 0.2%   | n.d.   |
| <sup>13</sup> C-Leucine         | N <sub>1/2</sub> | n.d.   | 0.3%   | 50.1%  | 0.2%   | n.d.   |
|                                 |                  | n.d.   | 0.2%   | 50.0%  | 0.1%   | n.d.   |
|                                 |                  | n.d.   | 0.3%   | 49.4%  | 0.1%   | n.d.   |
|                                 |                  | n.d.   | 0.3%   | 49.3%  | 0.1%   | n.d.   |
|                                 | N <sub>3/4</sub> | n.d.   | 0.3%   | 33.9%  | 0.2%   | n.d.   |
|                                 |                  | n.d.   | 0.3%   | 33.8%  | 0.2%   | n.d.   |
|                                 |                  | n.d.   | 0.3%   | 33.1%  | 0.2%   | n.d.   |
|                                 |                  | n.d.   | n.d.   | 32.7%  | 0.2%   | n.d.   |
|                                 | N <sub>T</sub>   | n.d.   | 0.3%   | 19.1%  | 0.2%   | n.d.   |
|                                 |                  | n.d.   | 0.3%   | 19.1%  | 0.2%   | n.d.   |
|                                 |                  | n.d.   | 0.3%   | 19.3%  | 0.2%   | n.d.   |
|                                 |                  | n.d.   | n.d.   | 19.0%  | 0.2%   | n.d.   |
|                                 | EF               | n.d.   | 0.2%   | 16.4%  | 0.1%   | n.d.   |
|                                 |                  | n.d.   | 0.2%   | 16.4%  | 0.1%   | n.d.   |
|                                 |                  | n.d.   | 0.2%   | 16.9%  | 0.1%   | n.d.   |
|                                 |                  | n.d.   | 0.2%   | 16.9%  | 0.1%   | n.d.   |
| <sup>13</sup> C-Isoleucine      | N <sub>1/2</sub> | 0.2%   | 0.1%   | 0.1%   | 29.4%  | 0.3%   |
|                                 |                  | 0.1%   | 0.2%   | 0.3%   | 33.4%  | 0.2%   |
|                                 |                  | 0.1%   | 0.3%   | 0.3%   | 34.5%  | n.d.   |
|                                 |                  | n.d.   | 0.3%   | 0.3%   | 35.5%  | n.d.   |
|                                 | N <sub>3/4</sub> | 0.0%   | 0.4%   | 0.5%   | 26.9%  | 0.2%   |
|                                 |                  | 0.0%   | 0.4%   | 0.4%   | 26.4%  | 0.2%   |
|                                 |                  | 0.1%   | 0.4%   | 0.4%   | 28.1%  | 0.2%   |
|                                 |                  | 0.2%   | 0.4%   | 0.4%   | 28.4%  | n.d.   |
|                                 | N <sub>T</sub>   | 0.0%   | 0.5%   | 0.5%   | 17.9%  | 0.2%   |
|                                 |                  | 0.3%   | 0.4%   | 0.4%   | 17.7%  | 0.2%   |
|                                 |                  | 0.1%   | 0.5%   | 0.5%   | 18.1%  | 0.2%   |
|                                 |                  | 0.1%   | 0.4%   | 0.5%   | 17.4%  | 0.2%   |
|                                 | EF               | 0.1%   | 0.4%   | 0.5%   | 16.5%  | 0.2%   |
|                                 |                  | 0.1%   | 0.4%   | 0.4%   | 16.5%  | 0.2%   |
|                                 |                  | 0.1%   | 0.4%   | 0.5%   | 16.6%  | 0.2%   |
|                                 |                  | 0.1%   | 0.4%   | 0.4%   | 16.1%  | 0.2%   |
| <sup>13</sup> C-Threonine       | N <sub>1/2</sub> | 9.5%   | 0.4%   | 0.5%   | 16.1%  | 45.2%  |
|                                 |                  | 9.3%   | 0.4%   | 0.4%   | 15.5%  | 45.0%  |
|                                 |                  | 9.2%   | 0.1%   | 0.1%   | 13.1%  | n.d.   |
|                                 |                  | n.d.   | 0.2%   | 0.3%   | 14.6%  | n.d.   |
|                                 | N <sub>3/4</sub> | 7.6%   | 0.5%   | 0.5%   | 13.0%  | 33.0%  |
|                                 |                  | 6.5%   | 0.3%   | 0.3%   | 12.3%  | 33.4%  |
|                                 |                  | 7.2%   | 0.5%   | 0.5%   | 12.7%  | 30.8%  |
|                                 |                  | 7.4%   | 0.4%   | 0.4%   | 12.7%  | 32.6%  |
|                                 | N <sub>T</sub>   | 5.6%   | 0.4%   | 0.4%   | 9.2%   | 19.0%  |
|                                 |                  | 5.7%   | 0.4%   | 0.5%   | 9.6%   | 20.6%  |
|                                 |                  | 5.7%   | 0.5%   | 0.5%   | 9.5%   | 20.3%  |
|                                 |                  | 5.7%   | 0.5%   | 0.5%   | 9.6%   | 20.0%  |
|                                 | EF               | 5.4%   | 0.4%   | 0.4%   | 8.9%   | 18.7%  |
|                                 |                  | 5.5%   | 0.4%   | 0.5%   | 8.9%   | 20.5%  |
|                                 |                  | 5.5%   | 0.4%   | 0.4%   | 8.7%   | 18.4%  |
|                                 |                  | 5.5%   | 0.3%   | 0.4%   | 8.5%   | 18.4%  |
| Means from 4 replicates         |                  |        |        |        |        |        |
| Mean                            |                  | Gly    | Val    | Leu    | Ile    | Thr    |
| <sup>13</sup> C-Valine          | N <sub>1/2</sub> | 2.7%   | 24.1%  | 4.3%   | 0.2%   | n.d.   |
|                                 | N <sub>3/4</sub> | 2.8%   | 22.4%  | 5.4%   | 0.3%   | n.d.   |
|                                 | N <sub>T</sub>   | 2.7%   | 14.2%  | 4.2%   | 0.2%   | n.d.   |
|                                 | EF               | 2.5%   | 12.6%  | 3.8%   | 0.2%   | n.d.   |
| <sup>13</sup> C-Leucine         | N <sub>1/2</sub> | n.d.   | 0.2%   | 49.7%  | 0.1%   | n.d.   |
|                                 | N <sub>3/4</sub> | n.d.   | 0.3%   | 33.4%  | 0.2%   | n.d.   |
|                                 | N <sub>T</sub>   | n.d.   | 0.3%   | 19.1%  | 0.2%   | n.d.   |
|                                 | EF               | n.d.   | 0.2%   | 16.6%  | 0.1%   | n.d.   |
| <sup>13</sup> C-Isoleucine      | N <sub>1/2</sub> | 0.1%   | 0.3%   | 0.3%   | 33.2%  | 0.3%   |
|                                 | N <sub>3/4</sub> | 0.1%   | 0.4%   | 0.4%   | 27.5%  | 0.2%   |
|                                 | N <sub>T</sub>   | 0.1%   | 0.4%   | 0.5%   | 17.8%  | 0.2%   |
|                                 | EF               | 0.1%   | 0.4%   | 0.4%   | 16.4%  | 0.2%   |
| <sup>13</sup> C-Threonine       | N <sub>1/2</sub> | 9.3%   | 0.3%   | 0.3%   | 14.8%  | 45.1%  |
|                                 | N <sub>3/4</sub> | 7.2%   | 0.4%   | 0.4%   | 12.7%  | 32.4%  |
|                                 | N <sub>T</sub>   | 5.7%   | 0.4%   | 0.5%   | 9.5%   | 20.0%  |
|                                 | EF               | 5.5%   | 0.4%   | 0.4%   | 8.7%   | 19.0%  |
| Standard deviations of the mean |                  |        |        |        |        |        |
| SEM                             |                  | Gly    | Val    | Leu    | Ile    | Thr    |
| <sup>13</sup> C-Valine          | N <sub>1/2</sub> | 0.069% | 0.465% | 0.073% | 0.024% | n.d.   |
|                                 | N <sub>3/4</sub> | 0.069% | 0.143% | 0.074% | 0.019% | n.d.   |
|                                 | N <sub>T</sub>   | 0.112% | 0.051% | 0.024% | 0.013% | n.d.   |
|                                 | EF               | 0.114% | 0.094% | 0.031% | 0.016% | n.d.   |
| <sup>13</sup> C-Leucine         | N <sub>1/2</sub> | n.d.   | 0.015% | 0.208% | 0.009% | n.d.   |
|                                 | N <sub>3/4</sub> | n.d.   | 0.008% | 0.285% | 0.008% | n.d.   |
|                                 | N <sub>T</sub>   | n.d.   | 0.018% | 0.049% | 0.013% | n.d.   |
|                                 | EF               | n.d.   | 0.021% | 0.145% | 0.014% | n.d.   |
| <sup>13</sup> C-Isoleucine      | N <sub>1/2</sub> | 0.026% | 0.050% | 0.053% | 1.339% | 0.060% |
|                                 | N <sub>3/4</sub> | 0.048% | 0.008% | 0.019% | 0.486% | 0.010% |
|                                 | N <sub>T</sub>   | 0.072% | 0.019% | 0.025% | 0.146% | 0.019% |
|                                 | EF               | 0.011% | 0.016% | 0.010% | 0.105% | 0.006% |
| <sup>13</sup> C-Threonine       | N <sub>1/2</sub> | 0.084% | 0.059% | 0.072% | 0.647% | 0.074% |
|                                 | N <sub>3/4</sub> | 0.239% | 0.032% | 0.031% | 0.147% | 0.568% |
|                                 | N <sub>T</sub>   | 0.014% | 0.020% | 0.020% | 0.079% | 0.340% |
|                                 | EF               | 0.030% | 0.019% | 0.024% | 0.093% | 0.489% |

Volatile compounds (2 independent experiments)

| Raw data                        |                  | Isoamyl alcohol | Isobutanol | Propanol |
|---------------------------------|------------------|-----------------|------------|----------|
| <sup>13</sup> C-Valine          | N <sub>1/2</sub> | 6.5%            | 13.7%      | 0.3%     |
|                                 | N <sub>3/4</sub> | 6.4%            | 13.2%      | 0.3%     |
|                                 | N <sub>T</sub>   | 6.5%            | 14.3%      | 0.3%     |
|                                 | EF               | 2.6%            | 3.3%       | 0.2%     |
| <sup>13</sup> C-Leucine         | N <sub>1/2</sub> | 10.5%           | 0.2%       | 0.0%     |
|                                 | N <sub>3/4</sub> | 10.1%           | 0.3%       | 0.1%     |
|                                 | N <sub>T</sub>   | 5.3%            | 0.4%       | 0.5%     |
|                                 | EF               | 2.4%            | 0.0%       | 0.0%     |
| <sup>13</sup> C-Isoleucine      | N <sub>1/2</sub> | 1.8%            | 0.0%       | 0.1%     |
|                                 | N <sub>3/4</sub> | 1.7%            | 0.0%       | 0.1%     |
|                                 | N <sub>T</sub>   | n.d.            | n.d.       | 0.0%     |
|                                 | EF               | n.d.            | n.d.       | 0.0%     |
| <sup>13</sup> C-Threonine       | N <sub>1/2</sub> | n.d.            | n.d.       | 0.4%     |
|                                 | N <sub>3/4</sub> | n.d.            | n.d.       | 0.4%     |
|                                 | N <sub>T</sub>   | n.d.            | n.d.       | 0.8%     |
|                                 | EF               | n.d.            | n.d.       | 0.4%     |
| Means from 2 replicates         |                  |                 |            |          |
| Mean                            |                  | Isoamyl alcohol | Isobutanol | Propanol |
| <sup>13</sup> C-Valine          | N <sub>1/2</sub> | 6.5%            | 13.4%      | 0.3%     |
|                                 | N <sub>3/4</sub> | 6.4%            | 13.9%      | 0.2%     |
|                                 | N <sub>T</sub>   | 2.7%            | 3.3%       | 0.2%     |
|                                 | EF               | 1.8%            | 1.9%       | 0.3%     |
| <sup>13</sup> C-Leucine         | N <sub>1/2</sub> | 10.3%           | 0.2%       | 0.1%     |
|                                 | N <sub>3/4</sub> | 5.3%            | 0.3%       | 0.3%     |
|                                 | N <sub>T</sub>   | 2.3%            | 0.0%       | 0.2%     |
|                                 | EF               | 1.7%            | 0.0%       | 0.1%     |
| <sup>13</sup> C-Isoleucine      | N <sub>1/2</sub> | n.d.            | n.d.       | 0.0%     |
|                                 | N <sub>3/4</sub> | n.d.            | n.d.       | 0.7%     |
|                                 | N <sub>T</sub>   | n.d.            | n.d.       | 0.5%     |
|                                 | EF               | n.d.            | n.d.       | 0.4%     |
| <sup>13</sup> C-Threonine       | N <sub>1/2</sub> | n.d.            | n.d.       | 38.1%    |
|                                 | N <sub>3/4</sub> | n.d.            | n.d.       | 19.5%    |
|                                 | N <sub>T</sub>   | n.d.            | n.d.       | 19.1%    |
|                                 | EF               | n.d.            | n.d.       | 16.7%    |
| Standard deviations of the mean |                  |                 |            |          |
| SEM                             |                  | Isoamyl alcohol | Isobutanol | Propanol |
| <sup>13</sup> C-Valine          | N <sub>1/2</sub> | 0.060%          | 0.255%     | 0.015%   |
|                                 | N <sub>3/4</sub> | 0.095%          | 0.345%     | 0.015%   |
|                                 | N <sub>T</sub>   | 0.030%          | 0.030%     | 0.000%   |
|                                 | EF               | 0.030%          | 0.025%     | 0.000%   |
| <sup>13</sup> C-Leucine         | N <sub>1/2</sub> | 0.088%          | 0.025%     | 0.015%   |
|                                 | N <sub>3/4</sub> | 0.085%          | 0.075%     | 0.260%   |
|                                 | N <sub>T</sub>   | 0.115%          | 0.005%     | 0.205%   |
|                                 | EF               | 0.010%          | 0.000%     | 0.015%   |
| <sup>13</sup> C-Isoleucine      | N <sub>1/2</sub> | n.d.            | n.d.       | 0.001%   |
|                                 | N <sub>3/4</sub> | n.d.            | n.d.       | 0.315%   |
|                                 | N <sub>T</sub>   | n.d.            | n.d.       | 0.245%   |
|                                 | EF               | n.d.            | n.d.       | 0.010%   |
| <sup>13</sup> C-Threonine       | N <sub>1/2</sub> | n.d.            | n.d.       | 0.850%   |
|                                 | N <sub>3/4</sub> | n.d.            | n.d.       | 0.250%   |
|                                 | N <sub>T</sub>   | n.d.            | n.d.       | 0.330%   |
|                                 | EF               | n.d.            | n.d.       | 0.455%   |



**Table S1: Analytical parameters used for the determination of isotopic enrichments of amino acids and volatile compounds using selected ion monitoring (SIM) mode.**

| Amino acids   | Derivatizing reagent | RT (min) | Ion clusters (m/z)                               |
|---------------|----------------------|----------|--------------------------------------------------|
| Alanine       | ECF <sup>a</sup>     | 3,86     | 116, 117, 118, 119                               |
|               | DMFDMA <sup>b</sup>  | 6,37     | 99, 100, 101, 102                                |
|               | DMFDMA <sup>b</sup>  | 6,37     | 158, 159, 160, 161                               |
| Glycine       | ECF <sup>a</sup>     | 4,19     | 102, 103, 104                                    |
|               | ECF <sup>a</sup>     | 4,19     | 175, 176, 177                                    |
|               | DMFDMA <sup>b</sup>  | 6,61     | 85, 86, 87                                       |
|               | DMFDMA <sup>b</sup>  | 6,61     | 144, 145, 146                                    |
| Valine        | ECF <sup>a</sup>     | 4,97     | 144, 145, 146, 147, 148, 149                     |
|               | DMFDMA <sup>b</sup>  | 7,37     | 127, 128, 129, 130, 131, 132                     |
|               | DMFDMA <sup>b</sup>  | 7,37     | 143, 144, 145, 146, 147, 148                     |
|               | DMFDMA <sup>b</sup>  | 7,37     | 186, 187, 188, 189, 190, 191                     |
| Leucine       | ECF <sup>a</sup>     | 5,67     | 158, 159, 160, 161, 162, 163, 164                |
| Isoleucine    | ECF <sup>a</sup>     | 5,85     | 158, 159, 160, 161, 162, 163, 165                |
| Threonine     | ECF <sup>a</sup>     | 6,48     | 146, 147, 148, 149, 150                          |
|               | ECF <sup>a</sup>     | 6,48     | 175, 176, 177, 178, 179                          |
| Serine        | ECF <sup>a</sup>     | 6,53     | 132, 133, 134, 135                               |
|               | ECF <sup>a</sup>     | 6,53     | 175, 176, 177, 178                               |
| Proline       | ECF <sup>a</sup>     | 6,83     | 142, 143, 144, 145, 146, 147                     |
| Aspartate     | ECF <sup>a</sup>     | 7,89     | 188, 189, 190, 191, 192                          |
|               | DMFDMA <sup>b</sup>  | 11,77    | 115, 116, 117, 118, 119                          |
|               | DMFDMA <sup>b</sup>  | 11,77    | 216, 217, 218, 219, 220                          |
| Glutamate     | ECF <sup>a</sup>     | 8,81     | 202, 203, 204, 205, 206, 207                     |
|               | DMFDMA <sup>b</sup>  | 12,75    | 111, 112, 113, 114, 115, 116                     |
|               | DMFDMA <sup>b</sup>  | 12,75    | 143, 144, 145, 146, 147, 148                     |
|               | DMFDMA <sup>b</sup>  | 12,75    | 230, 231, 232, 233, 234, 235                     |
| Phenylalanine | ECF <sup>a</sup>     | 9,53     | 192, 193, 194, 195, 196, 197, 198, 199, 200, 201 |
|               | DMFDMA <sup>b</sup>  | 13,67    | 143, 144, 145, 146, 147, 148, 149, 150, 151, 152 |
| Lysine        | ECF <sup>a</sup>     | 11,95    | 156, 157, 158, 159, 160, 161, 162                |
| Histidine     | ECF <sup>a</sup>     | 12,54    | 327, 328, 329, 330, 331, 332, 333                |
| Arginine      | BSTFA <sup>c</sup>   | 18,8     | 174, 175, 176, 177, 178, 179                     |

<sup>a</sup>ECF, ethyl chloroformate ; <sup>b</sup>DMFDMA, (N,N)-dimethylformamide dibutyl acetal ; <sup>c</sup>BSTFA, (N,O-bis(trimethylsilyl)trifluoroacetamide).

| Volatile compounds  | RT (min) | Ion clusters (m/z)                          |
|---------------------|----------|---------------------------------------------|
| Propanol            | 5,48     | 42, 43, 44, 45                              |
|                     | 5,48     | 60, 61, 62, 63                              |
| Isobutanol          | 6,86     | 43, 44, 45, 46, 47                          |
|                     | 6,86     | 74, 75, 76, 77, 78                          |
| Isoamyl alcohol     | 10,52    | 55, 56, 57, 58, 59                          |
|                     | 10,52    | 70, 71, 72, 73, 74, 75                      |
| Phenylethanol       | 31,16    | 65, 66, 67, 68, 69, 70, 71, 72, 73          |
|                     | 31,16    | 122, 123, 124, 125, 126, 127, 128, 129, 130 |
| Isoamyl acetate     | 7,69     | 70, 71, 72, 73, 74, 75                      |
| Isobutyl acetate    | 4,83     | 56, 57, 58, 59, 60                          |
| Phenylethyl acetate | 28,6     | 91, 92, 93, 94, 95, 96, 97, 98              |
| Ethyl isobutyrate   | 3,95     | 116, 117, 118, 119, 120, 121                |
| Ethyl isovalerate   | 6,2      | 88, 89, 90, 91, 92, 93                      |
| Isobutyric acid     | 21,95    | 73, 74, 75, 76, 77, 78                      |
| Isovaleric acid     | 24,93    | 60, 61, 62, 63, 64, 65                      |

**Table S2 : <sup>15</sup>N isotopic tracer experiments**

Isotopic enrichment of proteogenic amino acids and volatile compounds.

| Mean                                         |                  | Ala   | Gly   | Val   | Asp   | Phe   | Leu   | Ile   | Thr   | Ser   | Pro   | Lys   | His   | Glu   | Arg   |
|----------------------------------------------|------------------|-------|-------|-------|-------|-------|-------|-------|-------|-------|-------|-------|-------|-------|-------|
| <sup>4-<sup>15</sup>N</sup> Arg              | N <sub>1/2</sub> | 2.0%  | 3.3%  | 2.2%  | 1.7%  | 1.7%  | 1.9%  | 0.2%  | 0.6%  | 1.5%  | 6.0%  | 1.8%  | 7.6%  | 1.0%  | 98.2% |
|                                              | N <sub>1/4</sub> | 3.3%  | 2.4%  | 2.6%  | 2.4%  | 2.4%  | 2.5%  | 0.7%  | 0.7%  | 8.7%  | 2.0%  | 2.2%  | 22.8% | 97.4% |       |
|                                              | N <sub>1</sub>   | 14.7% | 10.9% | 14.1% | 16.0% | 19.0% | 16.0% | 14.0% | 12.6% | 14.6% | 16.9% | 6.4%  | 4.2%  | 16.7% | 98.1% |
|                                              | EF               | 16.1% | 16.2% | 14.1% | 16.4% | 18.1% | 16.3% | 14.1% | 13.2% | 12.6% | 16.4% | 6.2%  | 3.3%  | 17.1% | 97.0% |
| <sup>2-<sup>15</sup>N</sup> Gln              | N <sub>1/2</sub> | 24.7% | 23.4% | 25.6% | 32.0% | 26.9% | 22.5% | 16.6% | 19.2% | 22.3% | 15.9% | 11.9% | 41.0% | n.d.  |       |
|                                              | N <sub>1/4</sub> | 23.6% | 23.3% | 24.5% | 30.9% | 26.7% | 22.8% | 22.4% | 17.8% | 18.4% | 17.3% | 15.4% | 8.9%  | 38.7% | n.d.  |
|                                              | N <sub>1</sub>   | 21.3% | 23.8% | 24.1% | 29.7% | 25.3% | 24.1% | 23.4% | 22.4% | 28.2% | 8.4%  | 16.1% | 17.5% | 33.4% | n.d.  |
|                                              | EF               | 22.3% | 23.3% | 24.4% | 29.3% | 25.6% | 24.4% | 24.2% | 22.1% | 23.7% | 7.8%  | 16.1% | 15.2% | 32.8% | n.d.  |
| <sup>15</sup> N NH <sub>4</sub> <sup>+</sup> | N <sub>1/2</sub> | 34.1% | 31.2% | 36.6% | 47.8% | 37.9% | 30.1% | 34.0% | 17.7% | 29.1% | 31.2% | 21.1% | 17.8% | 44.4% | n.d.  |
|                                              | N <sub>1/4</sub> | 33.5% | 37.4% | 37.6% | 50.9% | 41.5% | 36.8% | 32.7% | 31.6% | 39.3% | 20.9% | 24.3% | 9.0%  | 47.6% | n.d.  |
|                                              | N <sub>1</sub>   | 25.3% | 28.2% | 27.7% | 34.4% | 28.9% | 27.2% | 27.7% | 22.5% | 25.7% | 12.0% | 19.9% | 16.7% | 30.6% | n.d.  |
|                                              | EF               | 25.6% | 28.7% | 27.8% | 33.5% | 27.1% | 26.3% | 25.7% | 21.2% | 23.7% | 9.9%  | 17.6% | 17.9% | 29.9% | n.d.  |

Experimental data  
n.d.: not determined

Part of total nitrogen in proteins (in mg N.L<sup>-1</sup>)  
contained in the proteogenic amino acids  
quantified in the study.

Proteogenic amino acids concentration (mgN.L<sup>-1</sup>).

| Mean             | Ala   | Gly   | Val  | Asp   | Phe  | Leu   | Ile  | Thr  | Ser   | Pro   | Lys  | His  | Glu  | Arg   |
|------------------|-------|-------|------|-------|------|-------|------|------|-------|-------|------|------|------|-------|
| N <sub>1/2</sub> | 5.35  | 4.27  | 2.71 | 3.46  | 1.78 | 4.27  | 1.85 | 2.84 | 3.66  | 4.59  | 1.62 | 2.90 | 3.44 | 5.35  |
| N <sub>1/4</sub> | 8.99  | 7.22  | 4.10 | 5.16  | 3.00 | 7.84  | 3.03 | 4.81 | 6.49  | 7.50  | 2.63 | 4.80 | 4.79 | 8.99  |
| N <sub>1</sub>   | 14.90 | 11.69 | 7.50 | 10.34 | 5.32 | 11.94 | 5.22 | 8.38 | 11.26 | 12.01 | 4.18 | 7.49 | 9.44 | 14.90 |
| EF               | 14.08 | 11.91 | 9.99 | 10.43 | 5.15 | 11.76 | 5.02 | 8.53 | 11.62 | 12.94 | 4.31 | 7.81 | 7.46 | 14.08 |

| total nitrogen in proteins (mg N.L <sup>-1</sup> ) | % of nitrogen in proteins found in quantified proteogenic amino acids |
|----------------------------------------------------|-----------------------------------------------------------------------|
| 58                                                 | 82.2%                                                                 |
| 96                                                 | 82.5%                                                                 |
| 163                                                | 82.3%                                                                 |
| 165                                                | 82.0%                                                                 |

Labeling recovered in proteogenic amino acids. Labeled and unlabeled fractions of nitrogen included in proteogenic amino acids are calculated from their concentrations expressed in mg N.L<sup>-1</sup> and their isotopic enrichments. Data are expressed in mg N.L<sup>-1</sup>.

| Mean                                         |                  | Ala     |           | Gly     |           | Val     |           | Asp     |           | Phe     |           | Leu     |           | Ile     |           | Thr     |           | Ser     |           | Pro     |           | Lys     |           | His     |           | Glu     |           | Arg      |            | Total |  |      |      |  |      |      |  |       |       |       |        |        |      |       |        |
|----------------------------------------------|------------------|---------|-----------|---------|-----------|---------|-----------|---------|-----------|---------|-----------|---------|-----------|---------|-----------|---------|-----------|---------|-----------|---------|-----------|---------|-----------|---------|-----------|---------|-----------|----------|------------|-------|--|------|------|--|------|------|--|-------|-------|-------|--------|--------|------|-------|--------|
|                                              |                  | Labeled | Unlabeled | Labeled* | Unlabeled* |       |  |      |      |  |      |      |  |       |       |       |        |        |      |       |        |
| <sup>4-<sup>15</sup>N</sup> Arg              | N <sub>1/2</sub> | 0.11    | 5.24      |         | 0.14      | 4.13    |           | 0.08    | 2.65      |         | 0.06      | 3.40    |           | 0.03    | 1.75      |         | 0.08      | 4.19    |           | 0.00    | 1.84      |         | 0.02      | 2.82    |           | 0.06    | 3.80      |          | 0.28       | 4.31  |  | 0.03 | 1.59 |  | 0.22 | 2.68 |  | 0.03  | 3.40  |       | 5.25   | 0.10   | 6.37 | 41.70 |        |
|                                              | N <sub>1/4</sub> | 0.29    | 8.70      |         | 0.18      | 7.04    |           | 0.11    | 4.00      |         | 0.07      | 2.93    |           | 0.07    | 2.93      |         | 0.20      | 7.65    |           | 0.02    | 3.01      |         | 0.06      | 6.44    |           | 0.05    | 6.85      |          | 0.05       | 2.58  |  | 0.11 | 4.70 |  | 1.09 | 3.70 |  | 8.76  | 0.23  | 11.73 | 67.65  |        |      |       |        |
|                                              | N <sub>1</sub>   | 2.19    | 12.71     |         | 1.27      | 10.42   |           | 1.06    | 6.44      |         | 1.04      | 4.28    |           | 1.04    | 4.28      |         | 1.86      | 10.08   |           | 0.76    | 4.46      |         | 1.64      | 9.62    |           | 1.91    | 10.10     |          | 0.27       | 3.91  |  | 0.32 | 7.17 |  | 1.57 | 7.87 |  | 14.62 | 0.28  | 31.27 | 103.29 |        |      |       |        |
|                                              | EF               | 2.12    | 11.96     |         | 1.89      | 9.98    |           | 1.41    | 8.58      |         | 1.72      | 8.72    |           | 0.93    | 4.22      |         | 1.80      | 9.95    |           | 0.71    | 4.31      |         | 1.47      | 10.15   |           | 2.12    | 10.62     |          | 0.27       | 4.04  |  | 0.25 | 7.95 |  | 1.28 | 6.18 |  | 13.65 | 0.43  | 30.79 | 104.30 |        |      |       |        |
| <sup>2-<sup>15</sup>N</sup> Gln              | N <sub>1/2</sub> | 1.30    | 4.93      |         | 1.00      | 3.27    |           | 0.69    | 2.01      |         | 1.11      | 2.36    |           | 0.48    | 1.30      |         | 0.96      | 3.31    |           | 0.44    | 1.41      |         | 0.44      | 2.39    |           | 0.70    | 2.96      |          | 1.02       | 3.57  |  | 0.25 | 1.37 |  | 0.34 | 2.95 |  | 1.41  | 2.03  |       | n.d.   | 3.35   |      | 16.17 | 37.90  |
|                                              | N <sub>1/4</sub> | 2.13    | 6.87      |         | 1.88      | 5.44    |           | 1.60    | 3.65      |         | 0.80      | 2.20    |           | 0.86    | 2.38      |         | 0.86      | 3.06    |           | 1.20    | 4.29      |         | 1.30      | 6.21    |           | 0.40    | 2.23      |          | 0.40       | 2.23  |  | 0.43 | 4.38 |  | 1.85 | 2.94 |  | n.d.  | 8.99  |       | 15.71  | 63.66  |      |       |        |
|                                              | N <sub>1</sub>   | 3.17    | 11.73     |         | 2.78      | 8.91    |           | 1.81    | 5.69      |         | 2.97      | 7.37    |           | 1.34    | 3.98      |         | 2.87      | 9.05    |           | 1.20    | 4.50      |         | 1.88      | 6.51    |           | 1.01    | 11.00     |          | 0.67       | 3.50  |  | 1.31 | 6.18 |  | 3.15 | 6.29 |  | n.d.  | 14.90 |       | 27.13  | 107.43 |      |       |        |
|                                              | EF               | 3.14    | 10.94     |         | 2.78      | 8.13    |           | 2.44    | 7.56      |         | 3.06      | 7.37    |           | 1.32    | 3.83      |         | 2.87      | 8.89    |           | 1.21    | 3.80      |         | 1.89      | 6.64    |           | 1.01    | 11.93     |          | 0.69       | 3.62  |  | 1.19 | 6.62 |  | 2.44 | 5.01 |  | n.d.  | 14.08 |       | 26.80  | 108.29 |      |       |        |
| <sup>15</sup> N NH <sub>4</sub> <sup>+</sup> | N <sub>1/2</sub> | 1.83    | 3.52      |         | 1.33      | 2.84    |           | 0.99    | 1.72      |         | 1.65      | 1.81    |           | 0.87    | 1.10      |         | 1.29      | 2.99    |           | 0.64    | 1.21      |         | 0.90      | 2.33    |           | 1.06    | 2.59      |          | 1.43       | 3.16  |  | 0.34 | 1.28 |  | 0.52 | 2.38 |  | 1.53  | 1.91  |       | n.d.   | 5.35   |      | 13.78 | 34.29  |
|                                              | N <sub>1/4</sub> | 3.01    | 5.98      |         | 2.70      | 4.52    |           | 1.54    | 2.56      |         | 2.62      | 2.53    |           | 1.25    | 1.76      |         | 2.89      | 4.96    |           | 0.99    | 2.04      |         | 1.52      | 3.29    |           | 2.55    | 3.93      |          | 1.57       | 5.94  |  | 0.43 | 4.37 |  | 2.28 | 2.51 |  | n.d.  | 8.99  |       | 23.99  | 55.38  |      |       |        |
|                                              | N <sub>1</sub>   | 3.76    | 11.14     |         | 3.29      | 8.39    |           | 2.08    | 5.42      |         | 3.56      | 6.78    |           | 1.54    | 3.78      |         | 3.24      | 8.70    |           | 1.44    | 3.78      |         | 1.89      | 6.50    |           | 2.90    | 8.36      |          | 1.44       | 10.57 |  | 0.83 | 3.35 |  | 1.25 | 6.24 |  | 2.89  | 6.55  |       | n.d.   | 14.90  |      | 30.11 | 104.45 |
|                                              | EF               | 3.61    | 10.47     |         | 3.42      | 8.49    |           | 2.77    | 7.22      |         | 3.49      | 6.94    |           | 1.40    | 3.75      |         | 3.09      | 8.66    |           | 1.21    | 3.73      |         | 1.81      | 6.72    |           | 2.76    | 8.86      |          | 1.28       | 11.66 |  | 0.78 | 3.55 |  | 1.40 | 6.41 |  | 2.23  | 6.23  |       | n.d.   | 14.08  |      | 29.30 | 105.78 |

\* Nitrogen from arginine is included only for labeled arginine experiments.

Nitrogen provided by arginine, glutamine or ammonium recovered in the proteogenic acids quantified in this study throughout the fermentation.

| Experiment                                   | in % of total nitrogen**   |                          |       |
|----------------------------------------------|----------------------------|--------------------------|-------|
|                                              | in mg N.L <sup>-1</sup> ** | in % of total nitrogen** |       |
| <sup>4-<sup>15</sup>N</sup> Arg              | N <sub>1/2</sub>           | 1.12                     | 2.3%  |
|                                              | N <sub>1/4</sub>           | 2.97                     | 3.7%  |
|                                              | N <sub>1</sub>             | 16.65                    | 12.4% |
|                                              | EF                         | 17.14                    | 12.7% |
| <sup>2-<sup>15</sup>N</sup> Gln              | N <sub>1/2</sub>           | 9.80                     | 20.4% |
|                                              | N <sub>1/4</sub>           | 15.23                    | 19.2% |
|                                              | N <sub>1</sub>             | 26.31                    | 19.6% |
|                                              | EF                         | 26.16                    | 19.4% |
| <sup>15</sup> N NH <sub>4</sub> <sup>+</sup> | N <sub>1/2</sub>           | 13.78                    | 28.7% |
|                                              | N <sub>1/4</sub>           | 23.99                    | 30.2% |
|                                              | N <sub>1</sub>             | 30.11                    | 22.4% |
|                                              | EF                         | 29.30                    | 21.7% |

\* Sum of the labeled fraction (in mg N.L<sup>-1</sup>) of proteogenic amino acids quantified in the study (Ala, Gly, Val, Asp, Phe, Leu, Ile, Thr, Ser, Pro, Lys, His, Glu, Arg) during experiments in presence of <sup>15</sup>N-labeled arginine, glutamine or ammonium.

\*\* Ratio between the labeled nitrogen fraction and the total nitrogen amount of proteogenic amino acids quantified in the study.

Mass and isotopic balance of arginine consumption and use.

| Mean (mM)        | Consumed arginine               | Proteogenic arginine | Isotopic enrichment | Labeled proteogenic arginine* | Arginine assimilated to other amino acids** |
|------------------|---------------------------------|----------------------|---------------------|-------------------------------|---------------------------------------------|
|                  | <sup>4-<sup>15</sup>N</sup> Arg |                      |                     |                               |                                             |
| N <sub>1/2</sub> | 0.232                           | 0.129                | 98%                 | 0.127                         | 0.023                                       |
| N <sub>1/4</sub> | 0.442                           | 0.213                | 97%                 | 0.208                         | 0.068                                       |
| N <sub>1</sub>   | 0.881                           | 0.351                | 98%                 | 0.344                         | 0.388                                       |
| EF               | 0.881                           | 0.351                | 97%                 | 0.340                         | 0.390                                       |

\* Calculated multiplying the arginine content in proteins (in mM) by the isotopic enrichment of proteogenic arginine.

\*\* Sum of the labeled fraction (in mM) of proteogenic amino acids quantified in the study except Arg (Ala, Gly, Val, Asp, Phe, Leu, Ile, Thr, Ser, Pro, Lys, His, Glu) during experiments in presence of <sup>15</sup>N-labeled arginine divided by 3 (number of nitrogen atoms from arginine available for de novo synthesis).

**Table S3: <sup>13</sup>C isotopic tracer experiments**

Isotopic enrichment of proteino-genic amino acids and volatile compounds

Experimental data  
n.d.: not determined

|                            | Mean             | Gly  | Val   | Leu   | Ile   | Thr   | Isobutanol | isoamyl alcoho | Propanol |
|----------------------------|------------------|------|-------|-------|-------|-------|------------|----------------|----------|
| <sup>13</sup> C-Valine     | N <sub>1/2</sub> | n.d. | 24.1% | 4.3%  | 0.2%  | n.d.  | 13.4%      | 6.5%           | 0.3%     |
|                            | N <sub>3/4</sub> | n.d. | 22.4% | 5.4%  | 0.3%  | n.d.  | 13.9%      | 6.4%           | 0.2%     |
|                            | N <sub>T</sub>   | n.d. | 14.2% | 4.2%  | 0.2%  | n.d.  | 3.3%       | 2.7%           | 0.2%     |
|                            | EF               | n.d. | 12.6% | 3.8%  | 0.2%  | n.d.  | 1.9%       | 1.8%           | 0.3%     |
| <sup>13</sup> C-Leucine    | N <sub>1/2</sub> | n.d. | 0.2%  | 49.7% | 0.1%  | n.d.  | 0.2%       | 10.3%          | 0.1%     |
|                            | N <sub>3/4</sub> | n.d. | 0.3%  | 33.4% | 0.2%  | n.d.  | 0.3%       | 5.3%           | 0.3%     |
|                            | N <sub>T</sub>   | n.d. | 0.3%  | 19.1% | 0.2%  | n.d.  | 0.0%       | 2.3%           | 0.2%     |
|                            | EF               | n.d. | 0.2%  | 16.6% | 0.1%  | n.d.  | 0.0%       | 1.7%           | 0.1%     |
| <sup>13</sup> C-Isoleucine | N <sub>1/2</sub> | 0.1% | 0.3%  | 0.3%  | 33.2% | 0.3%  | n.d.       | n.d.           | 0.0%     |
|                            | N <sub>3/4</sub> | 0.1% | 0.4%  | 0.4%  | 27.5% | 0.2%  | n.d.       | n.d.           | 0.7%     |
|                            | N <sub>T</sub>   | 0.1% | 0.4%  | 0.5%  | 17.8% | 0.2%  | n.d.       | n.d.           | 0.5%     |
|                            | EF               | 0.1% | 0.4%  | 0.4%  | 16.4% | 0.2%  | n.d.       | n.d.           | 0.4%     |
| <sup>13</sup> C-Threonine  | N <sub>1/2</sub> | 9.3% | 0.3%  | 0.3%  | 14.8% | 45.1% | n.d.       | n.d.           | 38.1%    |
|                            | N <sub>3/4</sub> | 7.2% | 0.4%  | 0.4%  | 12.7% | 32.4% | n.d.       | n.d.           | 19.5%    |
|                            | N <sub>T</sub>   | 5.7% | 0.4%  | 0.5%  | 9.5%  | 20.0% | n.d.       | n.d.           | 19.1%    |
|                            | EF               | 5.5% | 0.4%  | 0.4%  | 8.7%  | 19.0% | n.d.       | n.d.           | 16.7%    |

Labeling recovered in proteino-genic amino acids. Labeled and unlabeled fractions of proteino-genic amino acids were calculated from concentrations expressed in mM and isotopic enrichments of proteino-genic amino acids.

|                            | Mean             | Gly   |         |           | Val   |         |           | Leu   |         |           | Ile   |         |           | Thr   |         |           |
|----------------------------|------------------|-------|---------|-----------|-------|---------|-----------|-------|---------|-----------|-------|---------|-----------|-------|---------|-----------|
|                            |                  | Total | Labeled | Unlabeled |
| <sup>13</sup> C-Valine     | N <sub>1/2</sub> | n.d.  | n.d.    | n.d.      | 194   | 47      | 147       | 260   | 11      | 249       | 132   | 0       | 131       | n.d.  | n.d.    | n.d.      |
|                            | N <sub>3/4</sub> | n.d.  | n.d.    | n.d.      | 281   | 63      | 218       | 408   | 22      | 386       | 193   | 0       | 193       | n.d.  | n.d.    | n.d.      |
|                            | N <sub>T</sub>   | n.d.  | n.d.    | n.d.      | 506   | 72      | 434       | 698   | 29      | 669       | 349   | 1       | 348       | n.d.  | n.d.    | n.d.      |
|                            | EF               | n.d.  | n.d.    | n.d.      | 705   | 89      | 617       | 679   | 26      | 653       | 326   | 1       | 325       | n.d.  | n.d.    | n.d.      |
| <sup>13</sup> C-Leucine    | N <sub>1/2</sub> | n.d.  | n.d.    | n.d.      | 194   | 0       | 193       | 260   | 129     | 131       | 132   | 0       | 131       | n.d.  | n.d.    | n.d.      |
|                            | N <sub>3/4</sub> | n.d.  | n.d.    | n.d.      | 281   | 1       | 280       | 408   | 136     | 272       | 193   | 0       | 193       | n.d.  | n.d.    | n.d.      |
|                            | N <sub>T</sub>   | n.d.  | n.d.    | n.d.      | 506   | 2       | 505       | 698   | 134     | 565       | 349   | 1       | 348       | n.d.  | n.d.    | n.d.      |
|                            | EF               | n.d.  | n.d.    | n.d.      | 705   | 1       | 704       | 679   | 113     | 566       | 326   | 0       | 326       | n.d.  | n.d.    | n.d.      |
| <sup>13</sup> C-Isoleucine | N <sub>1/2</sub> | 138   | 0       | 138       | 194   | 0       | 193       | 260   | 1       | 259       | 132   | 44      | 88        | 194   | 0       | 194       |
|                            | N <sub>3/4</sub> | 217   | 0       | 217       | 281   | 1       | 280       | 408   | 2       | 406       | 193   | 53      | 140       | 330   | 1       | 330       |
|                            | N <sub>T</sub>   | 376   | 0       | 376       | 506   | 2       | 504       | 698   | 3       | 695       | 349   | 62      | 287       | 596   | 1       | 595       |
|                            | EF               | 359   | 0       | 359       | 705   | 3       | 703       | 679   | 3       | 676       | 326   | 53      | 273       | 613   | 1       | 611       |
| <sup>13</sup> C-Threonine  | N <sub>1/2</sub> | 138   | 13      | 125       | 194   | 1       | 193       | 260   | 1       | 259       | 132   | 19      | 112       | 194   | 87      | 107       |
|                            | N <sub>3/4</sub> | 217   | 16      | 201       | 281   | 1       | 280       | 408   | 2       | 406       | 193   | 25      | 169       | 330   | 107     | 223       |
|                            | N <sub>T</sub>   | 376   | 21      | 355       | 506   | 2       | 504       | 698   | 3       | 695       | 349   | 33      | 315       | 596   | 119     | 477       |
|                            | EF               | 359   | 20      | 340       | 705   | 3       | 703       | 679   | 3       | 676       | 326   | 29      | 298       | 613   | 116     | 496       |

Labeling recovered in volatile compounds. Labeled and unlabeled fractions of volatile compounds were calculated from their concentrations expressed in mM and their isotopic enrichments.

|                            | Isobutanol |         |           | isoamyl alcohol |         |           | Propanol |         |           |
|----------------------------|------------|---------|-----------|-----------------|---------|-----------|----------|---------|-----------|
|                            | Total      | Labeled | Unlabeled | Total           | Labeled | Unlabeled | Total    | Labeled | Unlabeled |
| <sup>13</sup> C-Valine     | 72         | 10      | 62        | 194             | 13      | 181       | 81       | 0       | 81        |
|                            | 144        | 20      | 124       | 521             | 33      | 488       | 316      | 1       | 315       |
|                            | 864        | 28      | 836       | 1577            | 42      | 1535      | 345      | 1       | 344       |
|                            | 1466       | 28      | 1438      | 2307            | 42      | 2265      | 339      | 1       | 338       |
| <sup>13</sup> C-Leucine    | 72         | 0.151   | 72        | 194             | 20      | 174       | 81       | 0       | 81        |
|                            | 144        | 0.425   | 144       | 521             | 28      | 493       | 316      | 1       | 315       |
|                            | 864        | 0.130   | 864       | 1577            | 37      | 1540      | 345      | 1       | 344       |
|                            | 1466       | 0.147   | 1466      | 2307            | 40      | 2267      | 339      | 0       | 339       |
| <sup>13</sup> C-Isoleucine | n.d.       | n.d.    | n.d.      | n.d.            | n.d.    | n.d.      | 81       | 0       | 81        |
|                            | n.d.       | n.d.    | n.d.      | n.d.            | n.d.    | n.d.      | 316      | 2       | 314       |
|                            | n.d.       | n.d.    | n.d.      | n.d.            | n.d.    | n.d.      | 345      | 2       | 343       |
|                            | n.d.       | n.d.    | n.d.      | n.d.            | n.d.    | n.d.      | 339      | 1       | 338       |
| <sup>13</sup> C-Threonine  | n.d.       | n.d.    | n.d.      | n.d.            | n.d.    | n.d.      | 81       | 31      | 50        |
|                            | n.d.       | n.d.    | n.d.      | n.d.            | n.d.    | n.d.      | 316      | 62      | 254       |
|                            | n.d.       | n.d.    | n.d.      | n.d.            | n.d.    | n.d.      | 345      | 66      | 279       |
|                            | n.d.       | n.d.    | n.d.      | n.d.            | n.d.    | n.d.      | 339      | 57      | 283       |

**Table S4 : Contribution of arginine, glutamine and ammonium to the intracellular nitrogen pool**

Nitrogen provided by arginine, glutamine or ammonium recovered in the proteinogenic acids quantified in this study throughout the fermentation.

| Experiment | in mg N.L-1* |       | in % of total nitrogen** |
|------------|--------------|-------|--------------------------|
|            |              |       |                          |
| 4-15N Arg  | N 1/2        | 6,37  | 13,2%                    |
|            | N3/4         | 11,73 | 14,8%                    |
|            | NT           | 31,27 | 23,2%                    |
|            | EF           | 30,79 | 22,8%                    |
| 2-15N Gln  | N 1/2        | 10,17 | 21,2%                    |
|            | N3/4         | 15,71 | 19,8%                    |
|            | NT           | 27,13 | 20,2%                    |
|            | EF           | 26,80 | 19,8%                    |
| 15N NH4+   | N 1/2        | 13,78 | 28,7%                    |
|            | N3/4         | 23,99 | 30,2%                    |
|            | NT           | 30,11 | 22,4%                    |
|            | EF           | 29,30 | 21,7%                    |

Experimental data  
n.d.: not determined

Origin of proteinogenic amino acid.

|            |       | total | direct incorporation | de novo synthesized from  |           | Arg, NH <sub>4</sub> , Gln contribution |
|------------|-------|-------|----------------------|---------------------------|-----------|-----------------------------------------|
|            |       |       |                      | de novo synthesized from  |           |                                         |
|            |       |       |                      | Arg, Gln, NH <sub>4</sub> | others aa |                                         |
| Valine     | N 1/2 | 194   | 47                   | 122                       | 25        | 83%                                     |
|            | N3/4  | 281   | 63                   | 182                       | 36        | 83%                                     |
|            | NT    | 506   | 72                   | 333                       | 101       | 77%                                     |
|            | EF    | 705   | 89                   | 465                       | 152       | 75%                                     |
| Leucine    | N 1/2 | 260   | 129                  | 164                       |           | 97%                                     |
|            | N3/4  | 408   | 136                  | 264                       | 7         | 81%                                     |
|            | NT    | 698   | 134                  | 459                       | 105       | 77%                                     |
|            | EF    | 679   | 113                  | 437                       | 129       | 77%                                     |
| Isoleucine | N 1/2 | 132   | 44                   | 83                        | 5         | 94%                                     |
|            | N3/4  | 193   | 53                   | 125                       | 15        | 89%                                     |
|            | NT    | 349   | 62                   | 229                       | 57        | 80%                                     |
|            | EF    | 326   | 53                   | 210                       | 63        | 77%                                     |
| Threonine  | N 1/2 | 194   | 87                   | 122                       |           | 96%                                     |
|            | N3/4  | 330   | 107                  | 214                       | 9         | 82%                                     |
|            | NT    | 596   | 119                  | 392                       | 85        | 79%                                     |
|            | EF    | 613   | 116                  | 394                       | 102       | 79%                                     |

Combining <sup>13</sup>C and <sup>15</sup>N isotope tracer experiments, we can differentiate proteinogenic leucine, valine, isoleucine and threonine originated from direct incorporation of consumed amino acid, *de novo* synthesis using nitrogen from arginine, glutamine and ammonium or from other amino acids. This allowed to assess the contribution of the 3 most abundant amino acids to the intracellular pool of nitrogen used for *de novo* biosynthesis.
